1 Title

2 Multi-omic analysis of urothelial cancer patients treated with PD-L1  
3 blockade demonstrates the contribution of both systemic and somatic  
4 factors to the biology of response and resistance

5

6 Authors

7 Alexandra Snyder<sup>1\*</sup>, Tavi Nathanson<sup>2\*</sup>, Samuel Funt<sup>1\*</sup>, Arun Ahuja<sup>2</sup>, Jacqueline Buros Novik<sup>2</sup>, Matthew D.  
8 Hellmann<sup>1</sup>, Eliza Chang<sup>2</sup>, Bulent Arman Aksoy<sup>2</sup>, Hikmat Al-Ahmadie<sup>3</sup>, Erik Yusko<sup>4</sup>, Marissa Vignali<sup>4</sup>, Sharon  
9 Benzeno<sup>4</sup>, Mariel Boyd<sup>1</sup>, Meredith Moran<sup>1</sup>, Gopa Iyer<sup>1</sup>, Harlan S. Robins<sup>4,5</sup>, Elaine R. Mardis<sup>6</sup>, Taha Merghoub<sup>1</sup>,  
10 Jeff Hammerbacher<sup>2^</sup>, Jonathan Rosenberg<sup>1^</sup>, Dean Bajorin<sup>1^</sup>

11

12 \*These authors contributed equally.

13 ^These authors are co-corresponding.

14

15 Affiliations:

16 <sup>1</sup>Department of Medicine, Memorial Sloan Kettering Cancer Center, New York, NY; Department of Medicine,  
17 Weill Cornell Medical College, New York, NY 10065

18 <sup>2</sup>Department of Genetics and Genomic Sciences, Icahn School of Medicine at Mount Sinai, New York, NY  
19 10029

20 <sup>3</sup>Department of Pathology, Memorial Sloan Kettering Cancer Center, New York, NY 10065

21 <sup>4</sup>Adaptive Biotechnologies, Seattle, WA 98102

22 <sup>5</sup>Fred Hutchinson Cancer Research Center, Seattle, Washington 98109

23 <sup>6</sup>Institute for Genomic Medicine; The Research Institute at Nationwide Children's Hospital; The Ohio State  
24 University College of Medicine; Columbus, OH 43205

25

26 The authors declare no potential conflicts of interest.

## 27 Abstract

28 Background: Inhibition of programmed death-ligand one (PD-L1) with atezolizumab can induce  
29 durable clinical benefit (DCB) in patients with metastatic urothelial cancers, including complete  
30 remissions in patients with chemotherapy refractory disease. Although mutation load and PD-L1  
31 immune cell (IC) staining have been associated with response, they lack sufficient sensitivity  
32 and specificity for clinical use. Thus, there is a need to evaluate the peripheral blood immune  
33 environment and to conduct detailed analyses of mutation load, predicted neoantigens and  
34 immune cellular infiltration in tumors to enhance our understanding of the biologic underpinnings  
35 of response and resistance.

36

37 Methods and Findings: We performed whole exome sequencing (WES), RNA sequencing  
38 (RNA-seq), and T cell receptor sequencing (TCR-seq) of pre-treatment tumor samples as well  
39 as TCR sequencing of matched, serially collected peripheral blood pre- and post-treatment with  
40 atezolizumab. These parameters were assessed for correlation with DCB (defined as  
41 progression free survival (PFS) > 6 months) and overall survival (OS), both alone and in the  
42 context of clinical and intratumoral parameters known to be predictive of survival in this disease  
43 state.

44

45 Patients with DCB displayed a higher proportion of tumor infiltrating T lymphocytes (TIL) (n=24,  
46 Mann-Whitney p=0.047). Pre-treatment peripheral blood TCR clonality below the median was  
47 associated with improved PFS (n=29, log-rank p=0.048) and OS (n=29, log-rank p=0.011).

48 Patients with DCB also demonstrated more substantial expansion of tumor-associated TCR  
49 clones in the peripheral blood 3 weeks after starting treatment (n=22, Mann-Whitney p=0.022).

50 The combination of high pre-treatment peripheral blood TCR clonality with elevated PD-L1 IC

51 staining in tumor tissue was strongly associated with poor clinical outcomes (n=10, HR=86.22,  
52 95% CI (2.55, 491.65)). Marked variations in mutation loads were seen with different somatic  
53 variant calling methodologies, which in turn impacted associations with clinical outcomes.  
54 Missense mutation load, predicted neoantigen load and expressed neoantigen load did not  
55 demonstrate significant association with DCB (n=25, Mann-Whitney p=0.22, n=25, Mann-  
56 Whitney p=0.55, and n=25, Mann-Whitney p=0.29 respectively). Instead, we found evidence of  
57 time-varying effects of somatic mutation load on progression-free survival in this cohort (n=25,  
58 p=0.044).

59

60 Conclusions: These results demonstrate the complex nature of immune response to checkpoint  
61 blockade and the compelling need for greater interrogation and data integration of both host and  
62 tumor factors. Incorporating these variables in prospective studies will facilitate identification and  
63 treatment of resistant patients.

## 64 Introduction

65 Atezolizumab has demonstrated responses in 15-25% of patients with advanced urothelial  
66 carcinoma and improved survival compared to historical expectations (1,2). Similar to predictive  
67 factor analyses in melanoma, colon cancer and non-small cell lung cancer studies with other  
68 checkpoint blockade agents, Rosenberg and colleagues reported a statistically significant  
69 association between mutation load and response to atezolizumab in urothelial cancer patients  
70 (2). However, mutation load in the atezolizumab study was predicted based on an estimate  
71 using a targeted panel and not with WES. Similar to findings from prior studies, the association  
72 between this predicted mutation load and outcomes in patients with urothelial cancer was not  
73 dichotomous; there were tumors from patients with elevated mutation load that did not respond

74 to therapy, and vice versa. Additionally, positive PD-L1 staining of infiltrating immune cells by  
75 immunohistochemistry was associated with, but poorly predicted, response. A statistical model  
76 suggested that both PD-L1 staining and mutation load impacted the likelihood of response.  
77 However, the authors did not recommend its clinical use.

78 Collectively, studies to date imply that a combination of immune parameters are  
79 necessary to gain further precision in determining the likelihood of benefit from these  
80 immunotherapies and that a single biologic marker will be insufficient. There have been few  
81 attempts to integrate molecular and immunologic data from patients treated with checkpoint  
82 blockade and their tumors. Consequently we performed whole exome (WES), RNA, and T cell  
83 receptor (TCR) sequencing of tumor samples from patients treated with atezolizumab as well as  
84 TCR sequencing of matched, serially collected peripheral blood.

85 In this cohort of patients, we illustrate the importance of host immune factors, including  
86 intratumoral and peripheral T cell receptor clonality, infiltration and expansion, to clinical  
87 outcomes. We did not find a significant association between mutation or expressed neoantigen  
88 load and progression free survival or DCB (defined as progression free survival (PFS) > 6  
89 months). However, we did demonstrate a time-dependent relationship between mutation load  
90 and outcome, implying that patients who experienced rapid progression displayed systemic  
91 indicators of immune deficiency despite elevated mutation load in the tumors. Calculation of the  
92 hazard ratios for each measured biomarker and clinical factor underscores the concept that a  
93 complex interaction of both host and tumor variables determines whether a patient will  
94 experience clinical benefit from anti-PD-L1 therapy.

95

## 96 **Methods**

### 97 Patients and clinical characteristics

98 All patients had locally advanced or metastatic urothelial carcinoma and were treated at  
99 Memorial Sloan Kettering Cancer Center (n=29) on protocol NCT02108652 (2). All patients  
100 initiated therapy in 2014 and were treated with atezolizumab 1200 mg IV every 3 weeks, and  
101 had consented to Institutional Review Board-approved protocols permitting tissue and blood  
102 collection and sequencing. Patient tumor samples were assessed prospectively and centrally  
103 (by HistoGeneX, Brussels, Belgium) for PD-L1 expression by immunohistochemistry with the  
104 SP142 assay (Ventana, AZ, USA) (1). The PD-L1 tumor-infiltrating immune cell (IC) status was  
105 defined by the percentage of PD-L1-positive immune cells in the tumor microenvironment: IC0  
106 (<1%), IC1 ( $\geq 1\%$  but <5%), and IC2/3 ( $\geq 5\%$ ) as defined in the original study. Smoking status  
107 was evaluated using previously completed self-reported smoking questionnaires or review of  
108 medical records.

109

### 110 Tumor and blood samples

111 All tumor tissue used for sequencing was obtained prior to dosing with atezolizumab. Tumor  
112 samples used for whole exome sequencing were all formalin-fixed paraffin embedded (FFPE).  
113 The presence of tumor tissue in the sequenced samples was confirmed by examination of a  
114 representative hematoxylin and eosin-stained slide by a genitourinary pathologist (H.A.).  
115 Peripheral blood mononuclear cells (PBMCs) were isolated and stored as previously described  
116 (3). PBMC were collected pre-treatment and during treatment.

117

118 Clinical efficacy analysis

119 Tumor responses to atezolizumab were evaluated by CT scan every 9 weeks for the first 12  
120 months following day 1 of cycle 1. After 12 months, tumor assessments were performed every  
121 12 weeks. The response evaluation criteria in solid tumors (RECIST) version 1.1 was used to  
122 define objective clinical responses by the institutional radiologist.

123

124 DNA extraction and high-throughput TCR $\beta$  Sequencing

125 Genomic DNA was purified from total PBMCs and tumor samples using the Qiagen DNeasy  
126 Blood extraction kit. The TCR $\beta$ CDR3 regions were amplified and sequenced using immunoSEQ  
127 (Adaptive Biotechnologies, Seattle, WA) as previously described (4). In brief, bias-controlled V  
128 and J gene primers were used to amplify rearranged V(D)J segments for high-throughput  
129 sequencing at ~20X coverage. After correcting sequencing errors via a clustering algorithm,  
130 CDR3 segments were annotated according to the International ImMunoGeneTics Collaboration  
131 (5) to identify the V, D, and J genes that contributed to each rearrangement. A mixture of  
132 synthetic TCR analogs in each PCR was used to estimate the absolute template abundance  
133 (i.e., the number of cells bearing each unique TCR sequence) from sequencing data, as  
134 previously described (6). The estimated TIL content was calculated as previously described (6–  
135 8). To determine TIL content in FFPE samples as a T cell fraction, we amplified several  
136 housekeeping genes and quantitated their template counts to determine the amount of DNA  
137 usable for TCRB sequencing. ImmunoSEQ then amplifies and sequences the molecules with  
138 rearranged TCRb chains. Because the immunoSEQ assay aligns sequences to the the IMGT  
139 database, sequences are annotated as complete VDJ rearrangements or non-productive  
140 rearrangements (a stop codon or out of frame CDR3 region was generated during VDJ  
141 recombination in one of the alleles; all downstream analysis in this work proceeded with  
142 complete, productive sequences. To estimate the number of starting templates that were in the

143 sample, the number of sequence reads for each TCRB sequences is measured. Synthetic  
144 control templates were also spiked into each sample, thereby enabling quantitation of input  
145 TCRB templates from the read counts. To determine the proportion of T cells in the FFPE  
146 samples, we amplified several housekeeping genes and quantitated their template counts to  
147 determine the amount of DNA usable for TCRB sequencing. For each sample, Shannon entropy  
148 was also calculated on the clonal abundance of all productive TCR sequences in the data set.  
149 Shannon entropy was normalized to the range by dividing Shannon entropy by the logarithm of  
150 the number of unique productive TCR sequences in the data set. This normalized entropy value  
151 was then inverted ( $12 - \text{normalized entropy}$ ) to produce the clonality metric. Those T cell clones  
152 whose frequencies differed between samples from a given subject taken at different time points,  
153 or between cell populations (e.g., between total PBMCs and tumor) were computationally  
154 identified as previously described (9). The input data consisted of the absolute abundance for  
155 each TCR clone in each sample. Fisher's exact test was used to compute a p-value for each  
156 clone across the two samples, against the null hypothesis that the population abundance of the  
157 clone is identical in the two samples. We corrected for multiple testing to control FDR using the  
158 Benjamini-Hochberg procedure and employed a significance threshold of 0.01 on adjusted p-  
159 values.

160

### 161 Whole Exome Sequencing

162 Twenty-six FFPE-derived tumor and frozen PBMC-derived normal paired samples were  
163 sequenced by exome hybrid capture using the IDT xGen Whole Exome Panel  
164 ([https://www.idtdna.com/pages/products/nextgen/target-capture/xgen-lockdown-panels/xgen-](https://www.idtdna.com/pages/products/nextgen/target-capture/xgen-lockdown-panels/xgen-exome-panel)  
165 [exome-panel](https://www.idtdna.com/pages/products/nextgen/target-capture/xgen-lockdown-panels/xgen-exome-panel)) and standard protocols. Briefly, each sample was used to create a barcoded  
166 Illumina library, tumor samples were pooled at optimal multiplex to create an equimolar pool into  
167 the hybrid capture reaction, which was performed according to the manufacturer's suggested

168 protocol. Similarly, normal samples were pooled and introduced to the hybrid capture reaction.  
169 Following the recovery of captured library fragments, PCR amplification was performed, the  
170 resulting pools of fragments were quantitated using qPCR (Kapa Bio), and sequenced in  
171 separate lanes by paired end 150 bp reads, using the Illumina HiSeq 4000.

172

### 173 Somatic Variant Calling

174 DNA sequencing data for the tumor and normal samples were aligned to the GRCh37 reference  
175 using bwa-mem (v. 0.7.10) with default settings. The resulting BAMs were processed through  
176 Picard MarkDuplicates and the GATK (v. 3.5-0) pipeline including Base Quality Score  
177 Recalibration and Indel Realignment. Single nucleotide variants were called from Mutect (v.  
178 1.1.6) and Strelka (v. 1.0.14) with default settings. Variants from either call were included and  
179 the variants calls were further filtered to those with depth (in normal and tumor samples)  $\geq 7$   
180 reads,  $> 10\%$  tumor VAF and  $\leq 3\%$  normal VAF (10). Mutations per megabase was computed  
181 by normalizing the number of mutations by the number of loci with  $\geq 7$  reads in normal and  
182 tumor samples.

183

184 Variants were annotated as missense variants by Varcode (v. 0.5.10,  
185 <https://github.com/hammerlab/varcode>) and PyEnsembl (v. 1.0.3,  
186 <https://github.com/hammerlab/pyensembl>) using Ensembl Release 75 and annotated as  
187 deleterious using PolyPhen (v. 2.2.2).



188

189 Mutational signatures were inferred from the somatic mutation calls using *deconstructSigs*.

190

191 HLA typing

192 HLA types for each patient were computed from the normal sequencing data using OptiType (v.

193 1.0.0).

194

195 RNA-seq

196 RNA was extracted from twenty-six FFPE tumor samples and evaluated for quality and quantity

197 using the Agilent RNA pico chip. Each sample was prepared for sequencing by constructing an

198 Illumina Tru-Seq Stranded RNA kit, according to the manufacturer's protocol. The resulting

199 libraries were amplified by PCR, quantitated, pooled and processed through a hybrid capture

200 intermediate using the IDT xGen Exome reagent (as above). The captured fragments were

201 quantitated, diluted and were sequenced using 2 x 150 bp paired end reads on the Illumina

202 HiSeq 4000.

203

204 The RNA sequencing data were aligned to the GRCh37 reference an Ensembl Release 75

205 using STAR (v. 2.4.1d) and transcript quantification was performed using kallisto (v. 0.42.3).

206 The STAR alignment was only used for identifying variant-supporting reads in the RNA. For

207 gene-level analysis, the transcript quantifications were aggregated to the gene level using

208 tximport (<http://f1000research.com/articles/4-1521/v1>).

209

210 Expressed mutations and neoantigens were computed using Isovar (v. 0.0.6,

211 <https://github.com/hammerlab/isovar>). This examined the number of RNA reads containing the

212 mutation and the surrounding nucleotide context. Mutations (and neoantigens) were counted as  
213 expressed when there were at least 3 reads containing the mutated base.

214

215 sleuth (v. 0.28.1) was used for differential expression analysis and GSEA was used for pathway  
216 enrichment analysis. ESTIMATE was used to quantify immune and stromal scores from RNA-  
217 seq data.

218

#### 219 Neoantigen calling

220 Neoantigens were computed from all nonsynonymous mutations using Topiary (v. 0.1.0,  
221 <https://github.com/hammerlab/topiary>) and NetMHCCons (v. 1.1) and the computed HLA alleles  
222 from OptiType. As with expressed mutations, expressed neoantigens were those supported in  
223 the RNA with at least 3 uniquely-mapped reads matching the cDNA sequence.

224

#### 225 Statistical analysis

226 All statistical analysis was performed in Python and R (v. 3.3.1). Cohorts (v. 0.4.0,  
227 <https://github.com/hammerlab/cohorts>) was used to orchestrate the analysis. The Mann Whitney  
228 and Fisher's Exact test were performed using the Python scientific computing library, SciPy (v.  
229 0.18.1). Kaplan-Meier curves were computed with Lifelines (v. 0.9.1.0). Survival and logistic  
230 regression models were estimated using PyStan (v. 2.12.0.0) and the Stan statistical computing  
231 software (v. 2.12.0). Survival analyses utilized a proportional hazards piecewise exponential  
232 model with a random walk baseline hazard. The analysis for presence of a time-varying  
233 covariate effect was performed in R using the *survival* package (v. 2.39.5), whereas the  
234 estimation of the time-varying covariate effect was performed using Stan. This analysis  
235 estimated the covariate effect at each timepoint with a random-walk prior. In some cases,

236 alternative specifications of models written in Stan were interrogated as sensitivity analyses; see  
237 the github repo for details.

## 238 Results

### 239 Patient Characteristics

240 29 patients with metastatic urothelial cancer from a single institution treated with atezolizumab  
241 as part of a single-arm phase II study (IMvigor 210, NCT 02108652) were included in the  
242 analyses. The patients displayed characteristics typical of the metastatic urothelial cancer  
243 population studied in IMvigor 210: a preponderance of males with urothelial cancers of bladder  
244 origin, greater than half of whom had a reported prior smoking history (Table 1). Patients had an  
245 ECOG performance status of 0 or 1, and had 0 to 3 prior regimens of chemotherapy. Of this  
246 group, 25 patients had sufficient tumor tissue for WES, 26 for RNA-seq and 24 for TCR-seq. 29  
247 had a pre-treatment peripheral blood sample on which TCR-Seq could be performed; 24 had  
248 one pre-treatment and at least one post-treatment peripheral blood collection.

249

| Variable                | Durable Clinical Benefit<br>(n=9) | No Durable Benefit<br>(n=20) |
|-------------------------|-----------------------------------|------------------------------|
| Median Age (range)      | 66 (57-74)                        | 72 (46-81)                   |
| Male Sex                | 9 (100%)                          | 16 (80%)                     |
| Site of primary tumor   |                                   |                              |
| Bladder                 | 7 (78%)                           | 19 (95%)                     |
| Upper tract             | 2 (12%)                           | 1 (5%)                       |
| ECOG performance status |                                   |                              |

|                                                                                               |          |          |
|-----------------------------------------------------------------------------------------------|----------|----------|
| 0                                                                                             | 0 (0%)   | 1 (5%)   |
| 1                                                                                             | 9 (100%) | 19 (95%) |
| History of tobacco use                                                                        |          |          |
| No                                                                                            | 4 (44%)  | 7 (35%)  |
| Yes                                                                                           | 5 (56%)  | 13 (65%) |
| Hemoglobin concentration < 10gm/dL                                                            |          |          |
|                                                                                               | 1 (11%)  | 3 (15%)  |
| Albumin $\leq$ lower limit of normal                                                          |          |          |
|                                                                                               | 2 (22%)  | 5 (25%)  |
| Metastatic sites at baseline                                                                  |          |          |
| Visceral <sup>^</sup>                                                                         | 3 (33%)  | 16 (80%) |
| Liver                                                                                         | 2 (22%)  | 9 (45%)  |
| Lymph node only                                                                               | 6 (67%)  | 4 (20%)  |
| Number of previous systemic regimens in the metastatic setting                                |          |          |
| 0                                                                                             | 5 (56%)  | 3 (20%)  |
| 1                                                                                             | 2 (22%)  | 15 (70%) |
| 2                                                                                             | 1 (11%)  | 1 (5%)   |
| $\geq 3$                                                                                      | 1 (11%)  | 1 (5%)   |
| Previous neoadjuvant or adjuvant chemotherapy, with first progression within $\leq 12$ months |          |          |
|                                                                                               | 3 (33%)  | 2 (10%)  |
| Time since previous chemotherapy $\leq 3$ months                                              |          |          |
|                                                                                               | 2 (29%)  | 5 (26%)  |
| Prognostic risk group for previously treated patients*                                        |          |          |
| Low                                                                                           | 3 (42%)  | 7 (37%)  |
| Intermediate                                                                                  | 2 (29%)  | 5 (26%)  |
| High                                                                                          | 2 (29%)  | 7 (37%)  |
| Prognostic risk group for previously untreated patients†                                      |          |          |

|                                                                                                                                  |          |          |
|----------------------------------------------------------------------------------------------------------------------------------|----------|----------|
| Low                                                                                                                              | 0 (0%)   | 0 (0%)   |
| Intermediate                                                                                                                     | 2 (100%) | 0 (0%)   |
| High                                                                                                                             | 0 (0%)   | 1 (100%) |
| Intravesical BCG administered (%)                                                                                                | 2 (22%)  | 10 (50%) |
| ^Visceral metastasis defined as liver, lung, bone, or any non-lymph node or soft tissue metastasis.*Based on (11) †Based on (12) |          |          |

250

251

252

## 253 Intratumoral and peripheral TCR features associate with durable clinical 254 benefit

255 The importance of T cells to the anti-tumor response has long been known (13); the relevance  
256 of intratumoral and peripheral T cell receptor (TCR) clonality to the anti-tumor response is an  
257 area of active study. A single previous study of melanoma patients treated with anti-PD-1  
258 therapy demonstrated that patients whose tumors featured both high levels of tumor infiltrating T  
259 lymphocytes (TIL) along with high TIL clonality were more likely to experience radiographic  
260 response to therapy (8). A separate study examined the peripheral TCR repertoire in anti-CTLA-  
261 4-treated patients with prostate cancer or melanoma, and found that clonotype stability was  
262 associated with response (14). To our knowledge, no prior study has reported both intratumoral  
263 and peripheral TCR clonality in a single population treated with checkpoint blockade therapy.

264 We performed TCR sequencing of tumors and peripheral blood mononuclear cells  
265 (PBMC) at serial time points in our cohort. Due to limitations in sample availability, this analysis  
266 included tumors from 24 patients and peripheral blood from 29 patients, including pre-treatment  
267 samples in all patients, and up to 8 total time points. A median of 141,255 (range 43,052-  
268 335,089) T cells were analyzed per peripheral blood sample, including 82,636 (range 24,095-

269 207,860) unique TCRs, with a median clonality of 0.080 (range 0.014-0.37) and a median T cell  
270 proportion of 0.31 (range 0.082-0.64). In the tumors, the corresponding values included 1,402  
271 (range 63-133,167) T cells, 1,086 (range 67-56,273) unique TCRs, clonality of 0.096 (range  
272 0.033-0.34) and T cell proportion of 0.097 (range 0.0098-0.33).

273 In our patient group, we first asked whether there was an association between outcome  
274 and either tumor TCR clonality or TIL proportion, or with TCR clonality in the peripheral blood.  
275 Consistent with the data from Tumeh and colleagues (8), tumors from patients who experienced  
276 a DCB exhibited a higher TIL proportion and higher TCR clonality than those patients who  
277 experienced progressive disease (Fig 1A, Supplementary Fig S1A). Importantly, TIL proportion  
278 alone was also associated with DCB, with a median of 0.21 (range 0.049-0.33) in tumors from  
279 patients who had PFS greater than 6 months, versus 0.069 (range 0.0098-0.24) in tumors from  
280 patients who did not (n=24, Mann-Whitney p=0.047, Fig 1B); it remains unclear whether TIL  
281 clonality adds to TIL proportion in its association with DCB in this study (TIL proportion and  
282 clonality versus TIL proportion alone, n=24, log-likelihood p=0.100).

283

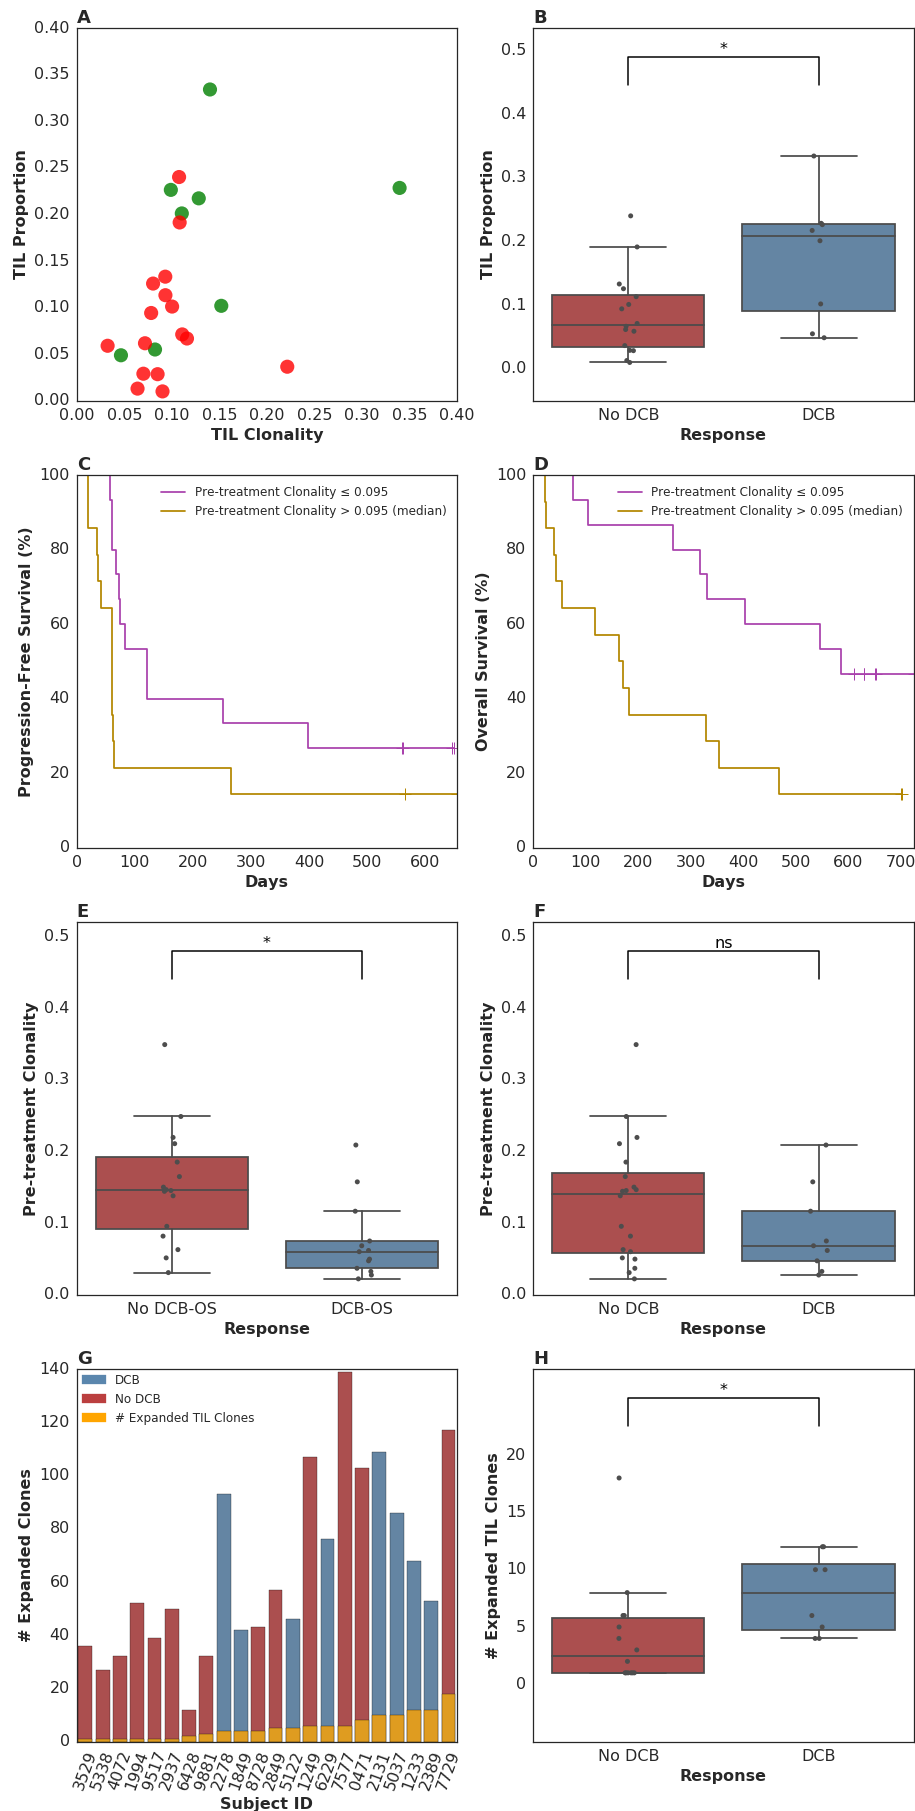

285 **Fig 1. T-cell receptor clonality and treatment response.**

286 (A) High-throughput quantitative sequencing of the rearranged TCR  $\beta$  genes using the  
287 immunoSEQ assay was performed. The x-axis represents clonality of the T-cell repertoire.  
288 Absence of DCB (red dots) was associated with lower levels of T-cell infiltration and T-cell  
289 clonality than in tumors from patients with DCB (green dots). TIL proportion and TIL clonality  
290 were not significantly more predictive of DCB than TIL proportion alone (n=24, log-likelihood  
291 p=0.100). (B) TIL proportion alone was associated with DCB, with a median of 0.21 (range  
292 0.049-0.33) in tumors from patients who had DCB, versus 0.069 (range 0.0098-0.24) in tumors  
293 from patients who did not (n=24, Mann-Whitney p=0.047). (C) Patients with a pre-treatment  
294 peripheral TCR clonality less than the median exhibited improved progression free survival  
295 (n=29, log-rank p=0.048). (D) Patients with a pre-treatment, peripheral TCR clonality less than  
296 the median exhibited improved overall survival (n=29, log-rank p=0.011). (E) There was a  
297 significant association between TCR clonality in the peripheral blood prior to initiating treatment  
298 and overall survival greater than 12 months (OS DCB, TCR clonality 0.060 (range 0.022-0.21);  
299 OS less than 12 months: 0.15 (range 0.031-0.35) (n=29, Mann-Whitney p=0.0061). (F) There  
300 was no significant association between pre-treatment peripheral TCR clonality and DCB (DCB,  
301 TCR clonality 0.068 (range 0.027-0.21); no DCB: 0.14 (range 0.022-0.35) (n=29, Mann-Whitney  
302 p=0.25). (G) Expansion of TCR clones found in the tumor infiltrating T lymphocytes (TIL, orange  
303 bars) occurred in the peripheral blood 3 weeks after initiating treatment in all patients. (H) The  
304 number of TCR clones found in TIL that expanded in the peripheral blood 3 weeks after initiating  
305 treatment was 8.00 (range 4.00-12.00) in patients with DCB and 2.50 (range 1.00-18.00) in non-  
306 DCB patients (n=22, Mann-Whitney p=0.022).

307

308 We next examined pre-treatment peripheral blood clonality and its relationship to DCB.

309 Because a diverse TCR repertoire in circulation may increase the likelihood that a tumor specific



310 T cell population is present, we hypothesized that T cell receptor clonality would be inversely  
311 associated with response. Indeed, low pre-treatment peripheral TCR clonality associated with  
312 improved PFS (n=29, log-rank p=0.048) and OS (n=29, log-rank p=0.011) (Figs 1C, 1D, 1E),  
313 although not with DCB (Fig 1F).

314 Finally, we explored the relationship between intratumoral and peripheral TCR clonality.  
315 Variations in individual T cell clones present in tumors can be tracked in the peripheral blood  
316 during treatment (examples in Supplementary Fig S1B). Expansion of tumor-associated TCRs  
317 occurred in the peripheral blood in all patients (Fig 1G). However, a more pronounced  
318 expansion of intratumoral TCR clones was observed in DCB patients at three weeks after  
319 initiation of treatment (second dose of therapy) (Fig 1H) that diminished by 6 weeks after  
320 therapy initiation (Supplementary Fig S1C). Interestingly, all patients with low pre-treatment  
321 peripheral TCR clonality and high TIL clonality survived greater than one year (Supplementary  
322 Fig S1D).

323

## 324 Association of tumor genetic features with progression free or overall 325 survival

326 To further examine intratumoral factors associated with therapeutic efficacy, we performed WES  
327 on 25 formalin fixed, paraffin-embedded (FFPE) archived tumor samples. Mean target coverage  
328 was 129 (range 44-194) in tumors, and 73 (range 59-91) in normal tissue. Single nucleotide  
329 variants were identified and annotated as silent, missense or nonsense mutations (Fig 2A).  
330 There was no significant association between median missense mutation load and DCB  
331 (median mutations per megabase 3.24 (range 0.038-11.46) in patients with DCB compared to  
332 0.45 (range 0.019-9.90) in those without DCB, n=25, Mann-Whitney p=0.22, Fig 2B). There was

333 also no significant association between missense mutation load and overall survival greater  
334 than 12 months (n=25, Mann-Whitney p=0.37, Supplementary Fig S2A). In a survival analysis  
335 for time to disease progression or mortality, the estimated hazard ratio associated with increase  
336 in missense SNV count per megabase was 0.92 (95% CI 0.78 - 1.09). These results are not  
337 surprising given that the present sample size (n=25) is underpowered to detect an effect of  
338 magnitude similar to that observed by Rosenberg and colleagues (2) (power=0.2 assuming  
339 median of 12.4 vs 6.4 mutations per megabase among patients with DCB vs non-DCB  
340 response).

341

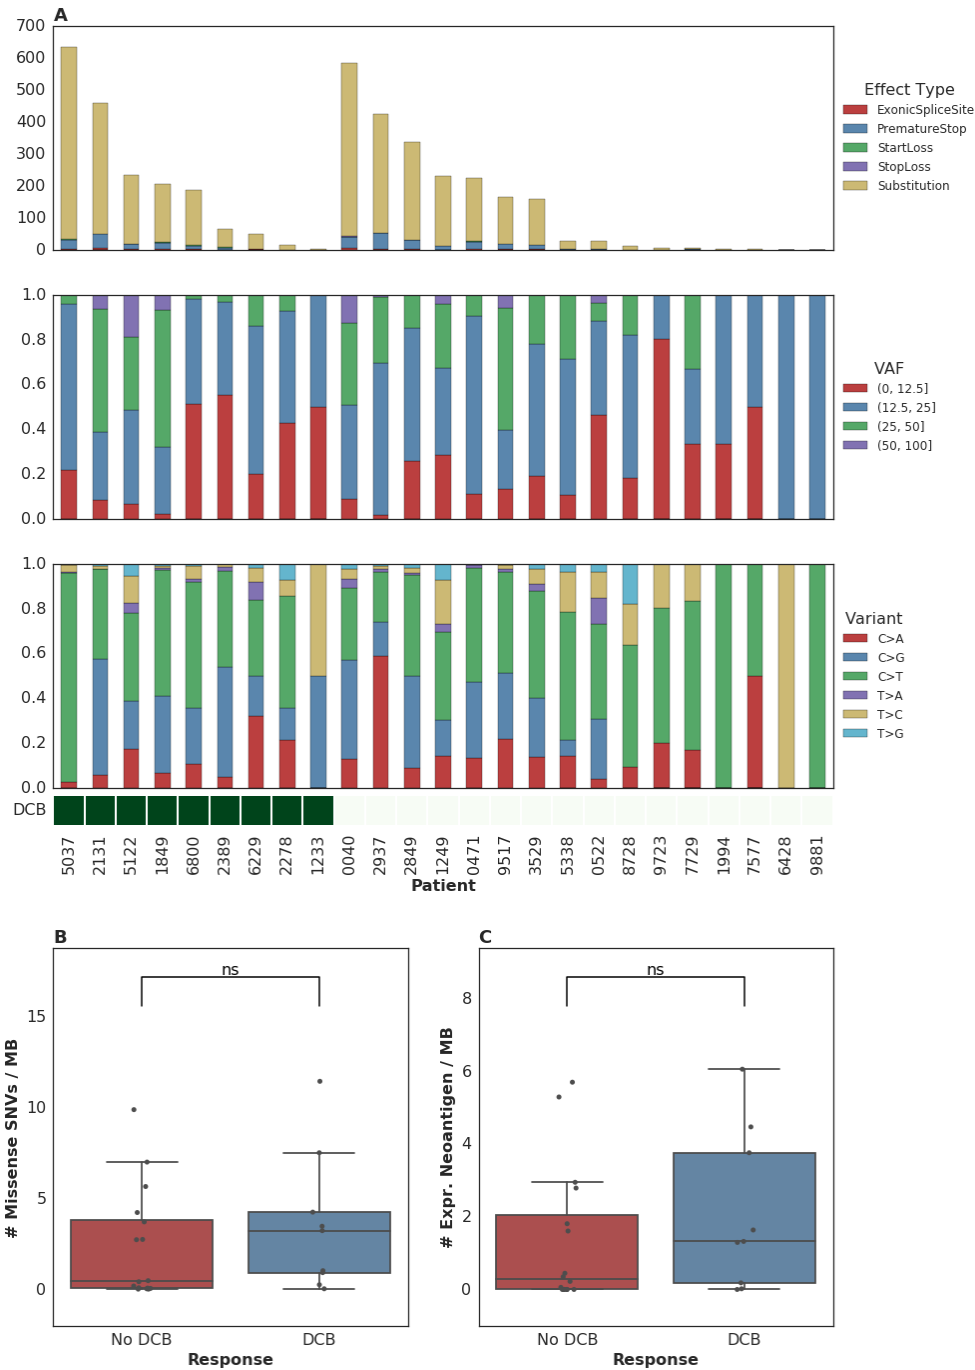

342

343

**Fig 2. Single nucleotide variants and treatment response.**

344

(A) Single nucleotide variants, premature stop codons, transversions, mutations in start or stop

345

codons and splice site variants as well as transitions and transversions were called for all

346

samples. (B) Median mutations per megabase of 3.24 (range 0.038-11.46) in tumors from

347 patients who progressed at or after 6 months, as compared to 0.45 (range 0.019-9.90) in those  
348 who progressed in less than 6 months (n=25, Mann-Whitney p=0.22). (C) Median expressed  
349 neoantigens in tumors from patients who progressed at or after 6 months was 1.32 (range 0.00-  
350 6.06), versus 0.29 (range 0.00-5.70) in those who progressed before 6 months (n=25, Mann-  
351 Whitney p=0.29).

352

353         When filtering to expressed mutations, we found a median of 0.79 (range 0.00-3.36)  
354 expressed mutations per megabase for patients with DCB and a median of 0.16 (range 0.00-  
355 3.34) expressed mutations per megabase for patients without DCB (n=25, Mann-Whitney  
356 p=0.26, Supplementary Fig S2B). Consistent with known importance of specific variant calling  
357 pipelines to output (15,16), we found that different filtering techniques impacted the association  
358 with DCB (Supplementary Table S1). Missense mutation load, when counting only mutations  
359 that were removed after post-processing (via Base Quality Score Recalibration (BQSR) and  
360 depth/variant allele frequency (VAF) filtering), was predictive of response (n=25, Mann-Whitney  
361 p=0.0078).

362         One hypothesis for explaining the association between mutation load and outcome to  
363 treatment with checkpoint blockade is the generation of neoantigens, altered peptides presented  
364 by the major histocompatibility complex that are capable of eliciting an anti-tumor T cell  
365 response and are more common with increased mutation load. After performing *in silico* HLA  
366 typing (Methods), we examined predicted neoantigens that are 8 to 11 amino acids in length  
367 resulting from the nonsynonymous mutations of patients treated with atezolizumab. There was  
368 no significant association between predicted neoantigens per megabase and either DCB or 12  
369 month overall survival. Patients with DCB had a median 4.58 (range 0.037-39.48) predicted  
370 neoantigens per megabase while patients without DCB had 1.35 (range 0.00-20.22) (n=25,  
371 Mann-Whitney p=0.55, Supplementary Figs 2C, 2D). Filtering of predicted neoantigens to focus

372 only on those expressed in RNA (Methods) also demonstrated no significant association  
373 between expressed predicted neoantigens and clinical benefit with atezolizumab (n=25, Mann-  
374 Whitney p=0.29, Fig 2C and Supplementary Fig S2B). Again, we acknowledge the limitations in  
375 statistical power to detect associations due to the sample size of our study.

376

### 377 Impact of mutation load on response likelihood increases over time

378 Given that the mutation load and outcomes were weakly associated in the complete IMvigor210  
379 dataset and not statistically significantly associated in this cohort, we embarked upon an  
380 exploration of additional factors, including tumor microenvironmental and systemic measures,  
381 which may modify the importance of this variable or independently impact outcomes.

382 To this end, we examined the time-varying impact of mutation load on PFS to see if  
383 mutation load had a differential impact on early hazards in contrast to late hazards. We found  
384 evidence of time-varying effects of somatic mutation load on progression-free survival in this  
385 cohort (n=25, p=0.044 for association of scaled Schoenfeld residuals with log(time)). There was  
386 little association of somatic mutation load with mortality or disease progression in the first 3  
387 months (n=25, HR=0.91, 95% CI (0.75, 1.07); Fig 3A). In contrast, there was a notable  
388 association of somatic mutation load with clinical events occurring more than 3 months after  
389 treatment (n=11, HR=0.69, 95% CI (0.38, 0.99)). When a similar analysis was performed for  
390 time-varying association with OS, the evidence in support of time-varying effects was similar  
391 (n=25, p=0.082, Fig 3B). Among patients who survived longer than 3 months, the number of  
392 somatic mutations per megabase was associated with a lower risk of mortality (n=11, HR=0.80,  
393 95% CI (0.60, 1.00)) than during the first three months (n=25, HR=1.02, 95% CI (0.79, 1.22), Fig  
394 3B). There was, however, weak evidence in support of a threshold at 3 months after follow-up.

395 In a nonparametric analysis, we found that the reduction in risk associated with somatic  
396 mutation load increased steadily over time (Figs 3C, 3D, 3E).

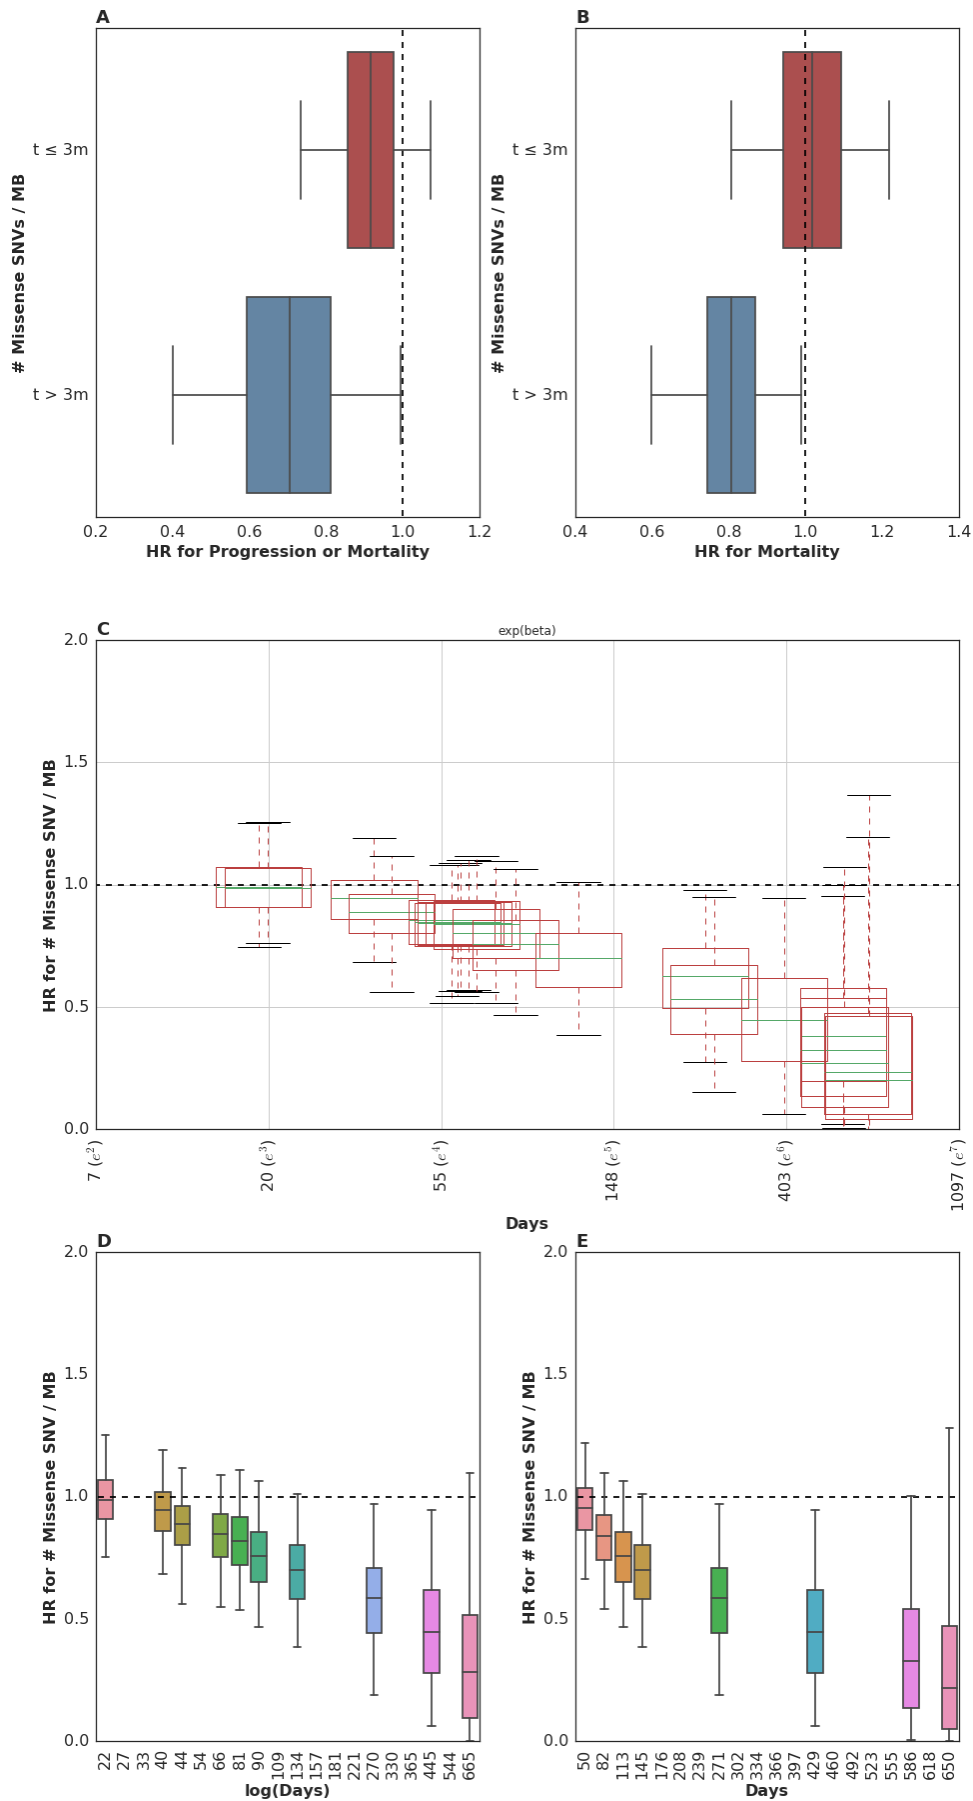

398 **Fig 3. Time dependent relationship between mutation load and treatment response.**

399 (A) There was no significant association between somatic mutation load and PFS for events  
400 occurring in the first 3 months (red box: HR=0.91, 95% CI (0.75, 1.07)), as compared to those  
401 more than 3 months following therapy (blue box: HR=0.69, 95% CI (0.38, 0.99)). (B) There was  
402 no significant association between somatic mutation load and OS for events occurring in the first  
403 3 months (red box: HR=1.02, 95% CI (0.79, 1.22)), as compared to those more than 3 months  
404 following therapy (blue box: HR=0.80, 95% CI (0.60, 1.00)). (C) The hazard ratio for each  
405 mutation per megabase, estimated at each unique failure time. Red box plots summarize 50%  
406 and 95% posterior intervals for each observed failure/censor time, with median values shown in  
407 green. Time (Days) is plotted on a log-scale. Estimates are not independent from one another  
408 since the model utilizes a random-walk parameterization to allow the variance in hazard over  
409 time to be modeled flexibly. (D) Summary of estimated change in hazard for disease  
410 progression or death with each observed mutation per megabase, reported as  $\exp(\beta)$  or  
411 Hazard Ratios. Estimates here are reported per interval of failure time, with failure times  
412 segmented at regular intervals of  $\log(\text{time})$  since therapy. Boxplots depict 50% and 95%  
413 posterior intervals for hazard ratio at each interval, with median values shown with horizontal  
414 lines. Intervals with no boxplot are those during which no failure or censor events were  
415 observed. Note that these estimates are not independent from one another since the model  
416 utilizes a random-walk parameterization to allow the variance in hazard over time to be modeled  
417 flexibly. (E) Summary of estimated change in hazard for disease progression or death with each  
418 observed mutation per megabase, reported as  $\exp(\beta)$  or Hazard Ratios. Estimates here are  
419 reported per interval of failure time, with failure times segmented at regular intervals of days  
420 since therapy. Boxplots depict 50% and 90% posterior intervals for hazard ratio at each interval,  
421 with median estimates shown as horizontal lines. Intervals with no boxplot are those during  
422 which no failure or censor events were observed. Note that these estimates are not independent



423 from one another since the model utilizes a random-walk parameterization to allow the variance  
424 in hazard over time to be modeled flexibly.

425

426         These data suggest that in patients with rapidly progressive disease, factors other than  
427 mutation load likely determine their outcome. This observation is not surprising in that clinical  
428 factor analysis of this disease state has identified a heterogeneous population of patients, with 5  
429 clinical factors distinguishing those likely to experience a rapid and early death from those more  
430 likely to survive longer (11). We hypothesized that such patients might simply be too clinically  
431 and systemically unwell to mount the necessary immune response, despite some of them  
432 harboring tumor biomarkers thought to confer a likelihood of DCB, including elevated mutation  
433 load. When we examined the 5-factor score in this subset relative to the rest of the dataset, we  
434 found that indeed patients who survived less than or equal to 3 months exhibited a significantly  
435 higher 5-factor score (3.00 (range 2.00-4.00), in contrast to 1.50 (range 0.00-4.00) in patients  
436 who survived longer than 3 months (n=26, Mann-Whitney p=0.018, Supplementary Fig S3A).  
437 Patients surviving less than 3 months were much more likely to have liver metastases: 100% in  
438 patients surviving less than or equal to 3 months and 22% in patients surviving longer than 3  
439 months (n=29, Fisher's Exact p=0.00097, Supplementary Fig S3B). There were no significant  
440 differences in these patients with respect to BCG exposure (n=29, Fisher's Exact p=0.20),  
441 missense SNV load (n=25, Mann-Whitney p=0.26) and pre-treatment peripheral TCR clonality  
442 (n=29, Mann-Whitney p=0.12). These data suggest that there is a subset of nearly end-stage  
443 patients with cancer in whom clinical variables may negate immunological response despite the  
444 presence of one or more favorable tumor-associated biomarkers. The inclusion of these clinical  
445 variables is warranted in future studies.

446

447 Examination of the tumor microenvironment shows evidence for adaptive  
448 immunity and suppression in responding tumors

449 Several studies have suggested that an “inflamed” tumor microenvironment, tumor or immune  
450 cell PD-L1 expression increase the likelihood of response to checkpoint blockade. As seen in  
451 the published IMVigor 210 cohort, PD-L1 IC expression was significantly associated with DCB in  
452 this subset (n=29, Spearman rho=0.48 p=0.0083, Supplementary Fig S4A). We quantified  
453 immune infiltration from RNA-seq using ESTIMATE (17). The immune score, while associated  
454 with the TIL proportion estimated through TCR Seq (Supplementary Fig S4B), was estimated to  
455 be 764.37 (range -1195.08-1509.65) in patients with DCB and 263.49 (range -1100.78-1734.28)  
456 in patients without DCB but was not significantly different (n=26, Mann-Whitney p=0.33,  
457 Supplementary Fig S4C). When we performed gene set enrichment analysis (GSEA) using the  
458 Hallmark Geneset (18), we did not observe any differentially expressed gene sets between  
459 tumors from patients with DCB versus no DCB. Furthermore, RNA expression of *PD-L1* did not  
460 correlate with reported immune cell PD-L1 staining level (n=26, Spearman rho=0.045 p=0.83,  
461 Supplementary Fig S4D). We did not observe a difference in tumor MHC class I expression  
462 according to DCB (Supplementary Fig S4E, *HLA-A*: n=26, Mann-Whitney p=0.26, *HLA-B*: n=26,  
463 Mann-Whitney p=0.36, *HLA-C*: n=26, Mann-Whitney p=0.24).

464         Given that such agnostic approaches did not reveal a clear association between tumor  
465 microenvironment factors and response, we pursued a hypothesis-driven approach examining  
466 the genes that show upregulation at the cell surface during T cell exhaustion. When categorized  
467 by DCB, there was no significant difference in expression of such genes, including *CTLA-4*,  
468 *TIGIT*, *HAVCR2* (*TIM-3*) or *LAG-3* (19). When grouped by PD-L1 staining, we found low  
469 expression of all markers in the PD-L1 low group (IC0), as expected. However, in the PD-L1  
470 high group (IC2), *HAVCR* exhibited significantly higher expression in tumors from patients who

471 experienced DCB than in those who did not (Supplementary Fig S4F). Interestingly, of the three  
472 IC2 tumors, two had missense SNV loads significantly below the median (17 and 57); the third  
473 had 412 SNVs. Additionally, although Rosenberg and colleagues (2) found that among the four  
474 TCGA subtypes of RNA expression, luminal cluster II showed a significantly higher response  
475 rate, no significant association was found here between the four clusters and DCB (n=20,  
476 Fisher's Exact p=0.36) (Supplementary Fig S4G), nor between the luminal/basal sub-  
477 categorization and DCB (n=20, Fisher's Exact p=1.00), possibly due to sample size.

## 478 Relative importance of somatic, immune, and clinical factors in resistance 479 and response to PD-L1 blockade

480 Unanswered questions that arise from the many studies of biomarker correlates of checkpoint  
481 blockade response are whether measures such as mutation load, PD-L1 staining, and others  
482 reflect the same "tumor state," or if each confers an independent effect on outcome?

483         When examined in conjunction with mutation load, the greater the expression of PD-L1,  
484 the more negative the association of mutation load with hazard (i.e. higher mutation load was  
485 associated with longer survival). Among patients with tumors showing little-to-no expression of  
486 PD-L1 (IC0 rated), each unit increase in missense SNV count per megabase was associated  
487 with a negligible change in hazard (n=4, HR=1.43, 95% CI (0.75, 2.98)). Among patients with  
488 tumors expressing PD-L1 at moderate or high levels (IC1 or IC2 staining), missense SNV count  
489 per megabase was associated with lower risk for disease progression or mortality (among IC1:  
490 n=11, HR=0.75, 95% CI (0.47, 1.14); among IC2: n=10, HR=0.73, 95% CI (0.48, 1.06)).

491 Although our limited sample size precludes making an assertion that mutation load is associated  
492 with survival in any particular subgroup (e.g. when looking among IC1 and IC2 tumors alone);  
493 our data do support the presence of an interaction among these variables (p=0.046 for

494 interaction; Supplementary Fig S5A). Given the plausibility of the finding that somatic mutation  
495 load may correlate better with survival among patients with an inflamed tumor  
496 microenvironment, the addition of somatic mutation load to PD-L1 IC staining warrants further  
497 study.

498         We found a similar albeit weaker interaction effect when looking at association of  
499 somatic mutation load (missense SNV count per megabase) and progression-free survival  
500 according to the presence/absence of liver metastasis prior to treatment administration ( $p=0.14$   
501 for interaction). Among patients without liver metastasis, somatic mutation load was associated  
502 with a lower risk for disease progression or mortality ( $n=16$ ,  $HR=0.73$ , 95% CI (0.50, 1.02),  
503 Supplementary Fig S5B) than patients with liver metastasis ( $n=9$ ,  $HR=0.96$ , 95% CI (0.66, 1.37),  
504 Supplementary Fig S5B).

505         To our surprise, although both PD-L1 staining and mutation load were each associated  
506 with response in the original study (2) these variables did not correlate with each other (Fig 4A).  
507 Furthermore, pre-treatment peripheral TCR clonality did not correlate with mutation load (Fig  
508 4B). The lack of association between these variables suggests that each might confer an  
509 independent or semi-independent impact on the likelihood of response to therapy. TCR clonality  
510 and infiltration did, however, correlate with PD-L1 IC score: those tumors with higher clonality or  
511 higher infiltration also featured higher PD-L1 staining ( $p=0.02$  and  $p=0.01$ , respectively, Figs 4C,  
512 4D).

513

514

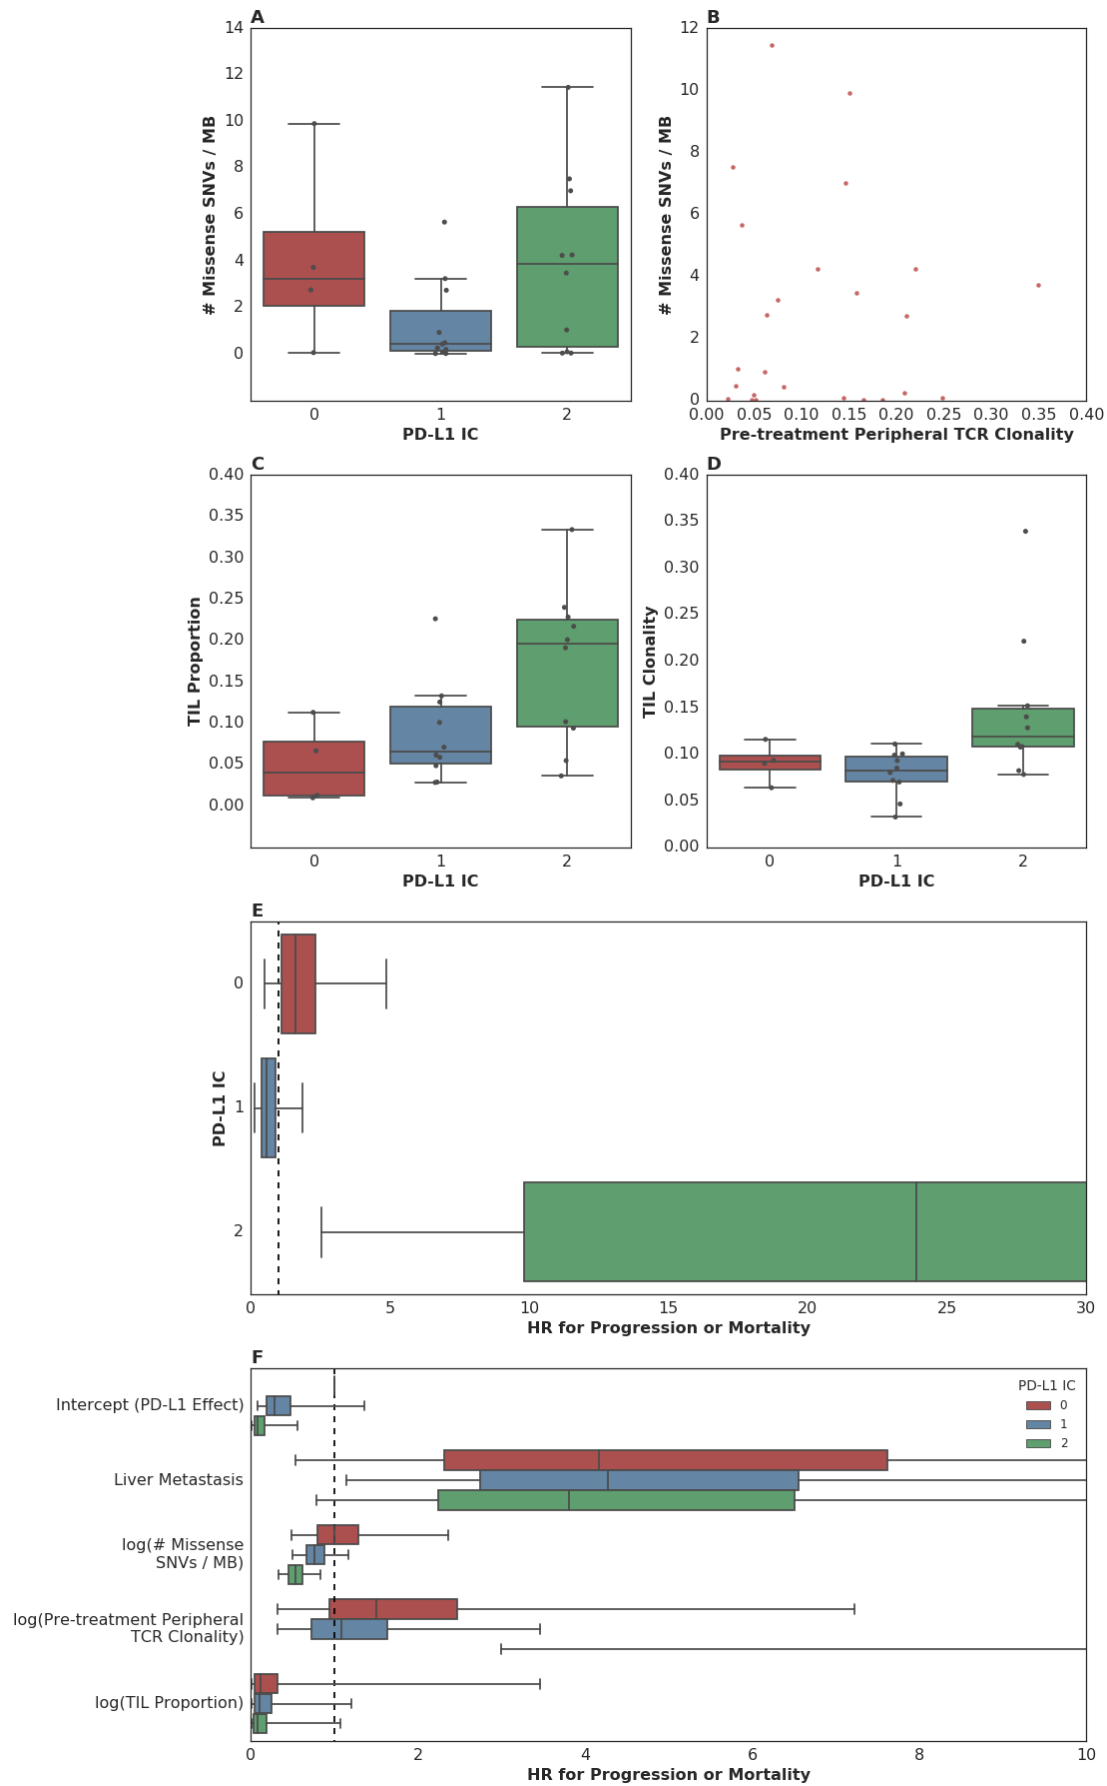

516 **Fig 4. Associations between measured somatic, immune and clinical variables.**

517 (A) Although both PD-L1 staining and mutation load each were weakly associated with  
518 response, these variables were not correlated with each other (n=25, Spearman rho=0.14  
519 p=0.51). (B) Pre-treatment peripheral TCR clonality did not correlate with mutation load (n=25,  
520 Pearson r=0.0017 p=0.99). (C) TIL proportion as estimated by TCR sequencing was associated  
521 with PD-L1 IC staining (n=24, Spearman rho=0.51 p=0.010). (D) TIL clonality was associated  
522 with PD-L1 IC staining (n=24, Spearman rho=0.48 p=0.017). (E) Hazard associated with  
523 log(pre-treatment peripheral TCR clonality) by level of immune cell PD-L1 expression (IC0, IC1  
524 or IC2). (F) Multivariate survival analysis of various clinical, peripheral and intratumoral  
525 biomarkers for association with time to disease progression or mortality (PFS), utilizing a  
526 varying-coefficient model which allows the hazard associated with a one-unit increase in a  
527 biomarker's value to vary according to level of intratumoral PD-L1 expression (IC score).

528

529 In an analysis to see whether the association between pre-treatment peripheral TCR  
530 clonality and progression-free survival varied by PD-L1 IC score, we found some evidence of an  
531 interaction (p=0.015 for interaction; Fig 4E). Among patients with low levels of PD-L1  
532 expression, there was little association between pre-treatment peripheral TCR clonality and  
533 progression-free survival (among IC0: n=4, HR=1.87, 95% CI (0.49, 4.86); among IC1: n=11,  
534 HR=0.69, 95% CI (0.14, 1.85)). Among patients with high levels of PD-L1 expression, by  
535 comparison, we observed almost complete separation of progression-free survival according to  
536 pre-treatment peripheral TCR clonality (among IC2: n=10, HR=86.22, 95% CI (2.55, 491.65);  
537 Fig 4E). Similar results were seen in analyses with respect to OS, and in a logistic regression  
538 analysis for DCB (Supplementary Figs 5C, 5D, 5E).

539 To resolve the hypothesis that those patients with low peripheral TCR clonality simply  
540 were healthier, we examined the association between 5-factor score and pre-treatment

541 peripheral TCR clonality and did not find such an association (n=26, Spearman rho=0.25  
542 p=0.22, Supplementary Fig S5F).

543 In a multivariate survival model for time to disease progression or mortality, which allows  
544 the effect of each biomarker to vary according to intratumoral PD-L1 IC score, we find that the  
545 correlation of each intratumoral, peripheral or clinical biomarker with disease progression or  
546 mortality is relatively independent of the others (Fig 4F, Supplementary Fig S5G). Perhaps with  
547 the notable exception of the impact of liver metastatic status on time to progression or survival,  
548 the correlation of each intratumoral or peripheral biomarker with outcome is strongest in the  
549 group with the highest levels of immune cell PD-L1 expression (Supplementary Table S2).  
550

## 551 Discussion

552 The treatment of previously incurable metastatic solid tumors with checkpoint blockade agents  
553 has led to dramatic success in a minority of patients, a finding that has generated substantial  
554 excitement in the field, with associated correlative studies and drug development. Despite such  
555 studies, a deeper understanding of the biology of response and resistance is often eclipsed by  
556 the search for biomarkers. Of the multitude of studied biomarkers, to date, PD-L1 staining  
557 (either tumor cell or immune cell) and mutation load have emerged as the most consistently  
558 positive predictors of response to checkpoint blockade (10,20,21). However, in all studies the  
559 exceptions are patients who benefit despite having tumors with low mutation load or who lack  
560 high PD-L1 staining, which demonstrates the inadequacy of these biomarkers in excluding and  
561 therefore denying a patient with limited or no treatment options access to potentially life-saving  
562 therapy.

563           Here, we undertook the in-depth characterization of tumors and peripheral blood from 29  
564 patients treated on IMvigor 210, a Phase II study in which 310 patients were treated with the  
565 anti-PD-L1 agent atezolizumab. Although the overall study found significant associations  
566 between mutation load as measured by the Foundation Medicine targeted sequencing panel  
567 and radiographic response (2), there was no statistically significant association between  
568 mutation load and durable clinical benefit or survival in the patient subset studied here, despite  
569 the similarity of our study population to the parent study. This contrast may be due to a  
570 combination of factors. First, though statistically significant, the association in the overall study  
571 was not categorical: as in other studies of mutation load, this factor alone was not predictive of  
572 response. Second, we have less power to detect this association in our smaller subset  
573 compared with the larger studied cohort. Third, standardized definitions and calculations of  
574 mutation load do not exist as yet; each published study has used differing methodologies  
575 (2,10,20,21). Indeed, in this study, depending on the method used, the association between  
576 mutation load and clinical outcomes varied from  $p < 0.08$  to  $p > 0.4$  (AUCs and p-values in  
577 Supplementary Table S1). To illustrate the fickle nature of defining mutation load, counting only  
578 the mutations excluded by BQSR, as opposed to only those remaining after BQSR, showed a  
579 significant association with DCB. Together, these findings underscore the need for improved  
580 and standardized mutation calling methods. The weak association of mutation load with DCB  
581 and the lack of such standardization render this biomarker unfit for application to individual  
582 patients at present. Furthermore, the time-dependent relationship between mutation load and  
583 survival implies that a clinical and immunological state may exist in patients with advanced  
584 cancer, such that patients with very rapidly progressing disease and expected death in  $< 3$   
585 months do not respond despite the presence of positive biomarkers.

586           In an attempt to deepen our understanding of the biology of response and resistance, we  
587 studied additional factors: immune factors, conveyed here as peripheral and intratumoral TCR



588 clonality and TIL proportion; and systemic factors such as the 5-factor score and presence of  
589 liver metastases. We found that even in this small dataset, TCR clonality below the median in  
590 the peripheral blood prior to treatment, expansion of tumor-associated TCR in the periphery 3  
591 weeks after initiating treatment, and higher TIL proportion all associated with clinical benefit.  
592 These data suggest that TCR sequencing provided additional insights into response and  
593 resistance beyond mutation load and PD-L1 staining. With respect to biomarker development,  
594 our study implies that non-invasive metrics such as pre-treatment peripheral TCR clonality and  
595 known prognostic features such as the presence of liver metastases may be worthy of further  
596 study in urothelial cancer patients treated with PD-L1 blockade.

597       Finally, though limited in power by the small sample size, we attempted to integrate the  
598 importance of the studied variables. This analysis demonstrated both hypothesized and  
599 unexpected interactions. For example, while mutation burden seemed to associate with  
600 outcome more significantly in PD-L1 IC1 and-2 tumors, high PD-L1 IC staining in the setting of  
601 high peripheral TCR clonality was associated with a substantial hazard for poor outcome. Given  
602 the significance of PD-L1 expression in mediating response to anti-PD-L1 therapy, the presence  
603 of these interactions may argue in their favor as predictive rather than prognostic biomarkers.  
604 Further analysis is required to elucidate the role of these biomarkers in mediating response to  
605 checkpoint blockade.

606       In conclusion, we have demonstrated that to truly understand and ultimately circumvent  
607 resistance to checkpoint blockade, we must pursue integrated studies of the somatic, immune  
608 and systemic features of each treated patient.

609

610

611

612

613 Acknowledgements: Carol Aghajanian and Jedd Wolchok for their mentorship of AS.

614

615 Funding: This work was supported by the Ludwig Center for Cancer Research and the NIH/NCI  
616 Cancer Center Support Grant P30 CA008748.

617

## 618 Supplementary Information, Captions

### 619 Supplementary Tables

620 Supplementary Table S1. Choice of depth and VAF filtering, as well as whether or not to run  
621 Base Quality Score Recalibration (BQSR), resulted in differences in predictive value for  
622 mutation load. We chose to optimize for precision, choosing the highlighted set of filters/BQSR.  
623 Precision is defined as the fraction of filtered missense mutations in IMPACT genes that were  
624 actual IMPACT panel variants. Recall is defined as the fraction of actual IMPACT panel variants  
625 that were found in the filtered missense results.

626

627 Supplementary Table S2. Summary of results from multivariate survival analysis of various  
628 clinical, peripheral and intratumoral factors to estimate their independent association with  
629 hazard for disease progression or mortality (PFS) and for mortality (OS) according to level of  
630 intratumoral PD-L1 expression (IC grade). Results are summarized as median and 95%  
631 posterior intervals.

632

## 633 Supplementary Figures

634 Supplementary Fig S1A. Tumors with less than the median TIL proportion or clonality were less  
635 likely to display DCB (25%, versus no DCB: 81%, n=24, Fisher's Exact p=0.021).

636

637 Supplementary Fig S1B. TCR overlap between the pre-treatment and 3-week posttreatment  
638 peripheral blood in one patient with limited clinical benefit (PFS=37 days) and one patient with  
639 durable clinical benefit (CR at 630 days after starting treatment). The association between pre-  
640 treatment peripheral blood TCR sequences (x axis) and posttreatment peripheral blood TCR  
641 sequences (y axis) is overlaid with the presence of tumor associated T cell clones. Gray  
642 indicates TCRs present only in the peripheral blood; blue indicates TCRs present in the tumor  
643 and blood; orange indicates TCRs present in the tumor and expanded in the blood with  
644 treatment.

645

646 Supplementary Fig S1C. There was no significant expansion of TIL-associated TCR clones  
647 between pre-treatment (3.00 (range 1.00-9.00)) and 6 weeks post-treatment (2.00 (range 1.00-  
648 8.00)), n=20, Mann-Whitney p=0.17.

649

650 Supplementary Fig S1D. The combination of high pre-treatment TIL and low pre-treatment  
651 peripheral blood TCR clonality were predictive of DCB (n=24, Fisher's Exact p=0.0069) and  
652 DCB-OS (n=24, Fisher's Exact p=0.014). For DCB, a logit model combining both was more  
653 predictive than peripheral blood (n=24, log-likelihood p=0.00029) or TIL (n=24, log-likelihood  
654 p=0.00051) clonality alone. For DCB-OS, both combined were more predictive than TIL (n=24,  
655 log-likelihood p=0.0029) clonality alone.

656

657 Supplementary Fig S2A. No significant association between the number of missense SNV per  
658 megabase and overall survival, with 2.13 (range 0.038-11.46) in tumors from those patients who  
659 survived greater than 12 months, versus 0.48 (range 0.019-9.90) in those who did not (n=25,  
660 Mann-Whitney p=0.37).

661  
662 Supplementary Fig S2B. No significant difference between median expressed neoantigens in  
663 tumors from patients who survived greater than or equal to 12 months: was 1.31 (range 0.00-  
664 6.06), versus 0.35 (range 0.00-5.30) in those who survived less than 12 months (n=25, Mann-  
665 Whitney p=0.36).

666  
667 Supplementary Fig S2C. No significant difference between median predicted neoantigens per  
668 megabase: 4.58 (range 0.037-39.48) in tumors from patients with DCB, as compared to 1.35  
669 (range 0.00-20.22) in those who progressed in less than 6 months (no DCB) (n=25, Mann-  
670 Whitney p=0.55).

671  
672 Supplementary Fig S2D. No significant difference between median predicted neoantigens per  
673 megabase in tumors from those patients who survived greater than 12 months (here used to  
674 define OS DCB) was 3.56 (range 0.037-39.48) as compared to 1.37 (range 0.00-20.22) in those  
675 who did not (no DCB) (n=25, Mann-Whitney p=0.81).

676  
677 Supplementary Fig S3A. Patients who survived less than 3 months (red box) exhibited a  
678 significantly higher 5-factor score (3.00 (range 2.00-4.00), as compared to 1.50 (range 0.00-  
679 4.00) in patients who survived >3mo (blue box) (n=26, Mann-Whitney p=0.018).

680

681 Supplementary Fig S3B. Patients who survived less than or equal to 3 months (red box) were  
682 more likely to have liver metastases (100% in patients who survived less than or equal to 3  
683 months and 22% in patients who survived longer than 3 months, n=29, Fisher's Exact  
684  $p=0.00097$ ).

685

686 Supplementary Fig S4A. PD-L1 IC staining as reported by the sponsor in the published study  
687 (2) and outcome in our cohort were significantly associated in this sub-study (n=29, Spearman  
688  $\rho=0.48$   $p=0.0083$ ).

689

690 Supplementary Fig S4B. ImmuneScore was associated with TIL proportion (n=24, Spearman  
691  $\rho=0.47$   $p=0.022$ ).

692

693 Supplementary Fig S4C. There was no association between ImmuneScore and DCB (DCB,  
694 764.37 (range -1195.08-1509.65); no DCB 263.49 (range -1100.78-1734.28) (n=26, Mann-  
695 Whitney  $p=0.33$ ).

696

697 Supplementary Fig S4D. PD-L1 expression as measured by RNA-seq was not associated with  
698 PD-L1 IC level (n=26, Spearman  $\rho=0.045$   $p=0.83$ ). Tumor cell PD-L1 staining was not  
699 available.

700

701 Supplementary Fig S4E. HLA Class I expression was not associated with DCB (HLA-A: n=26,  
702 Mann-Whitney  $p=0.26$ , HLA-B: n=26, Mann-Whitney  $p=0.36$ , HLA-C: n=26, Mann-Whitney  
703  $p=0.24$ ).

704

705 Supplementary Fig S4F. Expression of other inhibitory markers, in particular *HAVCR2* (also  
706 known as *TIM-3*) was higher in DCB patients in the IC2 group.

707

708 Supplementary Fig S4G. No association was found between TCGA RNA Subtype and response  
709 in this sub-study (n=20, Fisher's Exact p=0.36).

710

711 Supplementary Fig S5A. Hazard associated with log(missense SNV count per megabase) by  
712 level of immune cell (IC0, IC1 or IC2) PD-L1 expression.

713

714 Supplementary Fig S5B. Hazard associated with log(missense SNV count per megabase) by  
715 presence or absence of liver metastasis at enrollment.

716

717 Supplementary Fig S5C. Association of peripheral TCR clonality prior to treatment with time to  
718 mortality (OS) varies according to immune cell (IC0, IC1 or IC2) PD-L1 expression.

719

720 Supplementary Fig S5D. Association of peripheral TCR clonality prior to treatment with DCB  
721 varies according to immune cell (IC0, IC1 or IC2) PD-L1 expression.

722

723 Supplementary Fig S5E. Association of peripheral TCR clonality prior to treatment with DCB  
724 (OS) varies according to immune cell (IC0, IC1 or IC2) PD-L1 expression.

725

726 Supplementary Fig S5F. There was no significant relationship between 5-Factor score and pre-  
727 treatment TCR clonality (n=26, Spearman rho=0.25 p=0.22).

728

729 Supplementary Fig S5G. Multivariate survival analysis of various clinical, peripheral and  
730 intratumoral biomarkers for association with time to mortality (OS), utilizing a varying-coefficient  
731 model which allows the hazard associated with a one-unit increase in a biomarker's value to  
732 vary according to level of intratumoral PD-L1 expression (IC score). Note that the x-axis has  
733 been truncated at a value of 10 for clarity even though this results in the exclusion of some  
734 estimated HR values (specifically that for pre-treatment peripheral TCR clonality among IC2  
735 patients).

736

737 Supplementary Fig S6A. No significant association between the number of missense SNV found  
738 on MSK-IMPACT and DCB (DCB 0.13 (range 0.00-0.31) versus no DCB 0.046 (range 0.00-  
739 0.37) (n=25, Mann-Whitney p=0.42).

740

741 Supplementary Fig S6B. No significant association between the number of missense SNV found  
742 on MSK-IMPACT and overall survival (survival greater than 12 months 0.093 (range 0.00-0.31),  
743 versus less than 12 months 0.074 (range 0.00-0.37) (n=25, Mann-Whitney p=0.78).

744

745 Supplementary Fig S6C. There was no significant difference in APOBEC signature found in  
746 tumors from patients with PFS DCB (0.19 (range 0.00-0.56)) as compared to no DCB (0.00  
747 (range 0.00-0.46)) (n=25, Mann-Whitney p=0.23).

748

749 Supplementary Fig S6D. There was a significant correlation between missense SNV count and  
750 APOBEC signature mutations (n=25, Pearson  $r=0.40$   $p=0.048$ ).

751

752 Supplementary Fig S6E. There was no significant association between FGFR3 mutations or  
753 expression (n=26, Mann-Whitney p=0.39).

754

755 Supplementary Fig S6F. There was no significant association between MYC expression and  
756 outcome measured by PFS DCB (n=26, Mann-Whitney p=0.87).

757

758 Supplementary Fig S6G. There was no significant association between DNA damage response  
759 (DDR) mutations rated as “possible” by PolyPhen and DCB (n=25, Mann-Whitney p=0.20).

760

761 Supplementary Fig S6H. Univariate association of exonic SNV, missense SNV and neoepitope  
762 load with DCB, with (blue bars) and without (red bars) filtering by expression.

763

764 Supplementary Fig S6I. Univariate association of exonic SNV, missense SNV and neoepitope  
765 load with OS greater than 12 months, with (blue bars) and without (red bars) filtering by  
766 expression.

767

768 Supplementary Fig S6J. Univariate association of exonic SNV, missense SNV and neoepitope  
769 load with PFS, showing results with (blue bars) and without (red bars) filtering by expression.

770

771 Supplementary Fig S6K. Univariate association of exonic SNV, missense SNV and neoepitope  
772 load with OS, showing results with (blue bars) and without (red bars) filtering by expression.

773

774 Supplementary Fig S6L. Univariate association of expressed/total ratio for exonic SNV,  
775 missense SNV, and neoantigen loads with PFS.

776

777 Supplementary Fig S6M. Univariate association of expressed/total ratio for exonic SNV,  
778 missense SNV, and neoantigen loads with OS.



779

780 Supplementary Fig S6N. Univariate association of expressed/total ratio for exonic SNV,  
781 missense SNV, and neoantigen loads with DCB (PFS greater than 12 months).

782

783 Supplementary Fig S6O. Univariate association of expressed/total ratio for exonic SNV,  
784 missense SNV, and neoantigen loads with OS greater than 12 months.

785

786 Supplementary Fig S6P. There was no significant association between pack years of reported  
787 smoking history and DCB (n=29, Mann-Whitney p=0.87).

788

789 Supplementary Fig S6Q. There were significant associations between PFS (n=29, log-rank  
790 p=0.024) and OS (n=29, log-rank p=0.018) and the presence of liver metastasis.

791

792 Supplementary Fig S6R. There was a significant association between the presence of visceral  
793 metastases and poor overall survival (n=29, log-rank p=0.020).

794

795 Supplementary Fig S6S. There was not a significant association between 5-factor score and OS  
796 (n=26, log-rank p=0.13).

797

798 Supplementary Fig S6T. No significant association between the number of expressed missense  
799 SNV per megabase and DCB (DCB 0.79 (range 0.00-3.36), versus no DCB: 0.16 (range 0.00-  
800 3.34)), n=25, Mann-Whitney p=0.26.

801

802

## References

- 803 1. Powles T, Eder JP, Fine GD, Braithen FS, Loriot Y, Cruz C, et al. MPDL3280A (anti-PD-L1)  
804 treatment leads to clinical activity in metastatic bladder cancer. *Nature*.  
805 2014;515(7528):558–62.
- 806 2. Rosenberg JE, Hoffman-Censits J, Powles T, van der Heijden MS, Balar AV, Necchi A, et  
807 al. Atezolizumab in patients with locally advanced and metastatic urothelial carcinoma who  
808 have progressed following treatment with platinum-based chemotherapy: a single-arm,  
809 multicentre, phase 2 trial. *Lancet*. 2016;387(10031):1909–20.
- 810 3. Postow MA, Yuan J, Kitano S, Lesokhin AM, Wolchok JD. Markers for anti-cytotoxic T-  
811 lymphocyte antigen 4 (CTLA-4) therapy in melanoma. *Methods Mol Biol*. 2014;1102:83–95.
- 812 4. Robins HS, Campregher PV, Srivastava SK, Wachter A, Turtle CJ, Kahsai O, et al.  
813 Comprehensive assessment of T-cell receptor beta-chain diversity in alphabeta T cells.  
814 *Blood*. 2009 Nov 5;114(19):4099–107.
- 815 5. Lefranc M-P, Giudicelli V, Duroux P, Jabado-Michaloud J, Folch G, Aouinti S, et al. IMGT®,  
816 the international ImMunoGeneTics information system® 25 years on. *Nucleic Acids Res*.  
817 2015 Jan;43(Database issue):D413–22.
- 818 6. Wu D, Emerson RO, Sherwood A, Loh ML, Angiolillo A, Howie B, et al. Detection of  
819 minimal residual disease in B lymphoblastic leukemia by high-throughput sequencing of  
820 IGH. *Clin Cancer Res*. 2014 Sep 1;20(17):4540–8.
- 821 7. Hsu MS, Sedighim S, Wang T, Antonios JP, Everson RG, Tucker AM, et al. TCR  
822 Sequencing Can Identify and Track Glioma-Infiltrating T Cells after DC Vaccination. *Cancer*  
823 *Immunol Res*. 2016 May;4(5):412–8.
- 824 8. Tumei PC, Harview CL, Yearley JH, Shintaku IP, Taylor EJM, Robert L, et al. PD-1  
825 blockade induces responses by inhibiting adaptive immune resistance. *Nature*. 2014 Nov  
826 27;515(7528):568–71.
- 827 9. DeWitt WS, Emerson RO, Lindau P, Vignali M, Snyder TM, Desmarais C, et al. Dynamics  
828 of the cytotoxic T cell response to a model of acute viral infection. *J Virol*. 2015  
829 Apr;89(8):4517–26.
- 830 10. Rizvi, N., Hellmann, M, Snyder, Et al A. Mutational Landscape Determines Sensitivity to  
831 Programmed Cell Death-1 Blockade in Non-Small Cell Lung Cancer. *Science*. 2015;
- 832 11. Sonpavde G, Pond GR, Rosenberg JE, Bajorin DF, Choueiri TK, Necchi A, et al. Improved  
833 5-Factor Prognostic Classification of Patients Receiving Salvage Systemic Therapy for  
834 Advanced Urothelial Carcinoma. *J Urol*. 2016;195(2):277–82.
- 835 12. Bajorin DF, Dodd PM, Mazumdar M, Fazzari M, McCaffrey JA, Scher HI, et al. Long-term

- 836 survival in metastatic transitional-cell carcinoma and prognostic factors predicting outcome  
837 of therapy. *J Clin Oncol*. 1999 Oct;17(10):3173–81.
- 838 13. Dunn GP, Old LJ, Schreiber RD. The immunobiology of cancer immunosurveillance and  
839 immunoediting. *Immunity*. 2004;21(2):137–48.
- 840 14. Cha E, Klinger M, Hou Y, Cummings C, Ribas A, Faham M, et al. Improved survival with T  
841 cell clonotype stability after anti-CTLA-4 treatment in cancer patients. *Sci Transl Med*.  
842 2014;6(238):238ra70.
- 843 15. Alioto TS, Buchhalter I, Derdak S, Hutter B, Eldridge MD, Hovig E, et al. A comprehensive  
844 assessment of somatic mutation detection in cancer using whole-genome sequencing. *Nat*  
845 *Commun*. 2015 Dec 9;6:10001.
- 846 16. Qiu P, Pang L, Arreaza G, Maguire M, Chang KC, Marton MJ, et al. Data Interoperability of  
847 Whole Exome Sequencing (WES) Based Mutational Burden Estimates from Different  
848 Laboratories. *Int J Mol Sci* [Internet]. 2016;17(5). Available from:  
849 <http://dx.doi.org/10.3390/ijms17050651>
- 850 17. Bindea G, Mlecnik B, Tosolini M, Kirilovsky A, Waldner M, Obenauf AC, et al.  
851 Spatiotemporal dynamics of intratumoral immune cells reveal the immune landscape in  
852 human cancer. *Immunity*. 2013;39(4):782–95.
- 853 18. Liberzon A, Subramanian A, Pinchback R, Thorvaldsdottir H, Tamayo P, Mesirov JP.  
854 Molecular signatures database (MSigDB) 3.0. *Bioinformatics*. 2011;27(12):1739–40.
- 855 19. Tirosh I, Izar B, Prakadan SM, Wadsworth MH 2nd, Treacy D, Trombetta JJ, et al.  
856 Dissecting the multicellular ecosystem of metastatic melanoma by single-cell RNA-seq.  
857 *Science*. 2016;352(6282):189–96.
- 858 20. Van Allen EM, Miao D, Schilling B, Shukla SA, Blank C, Zimmer L, et al. Genomic  
859 correlates of response to CTLA-4 blockade in metastatic melanoma. *Science*.  
860 2015;350(6257):207–11.
- 861 21. Snyder A, Makarov V, Merghoub T, Yuan J, Zaretsky JM, Desrichard A, et al. Genetic basis  
862 for clinical response to CTLA-4 blockade in melanoma. *N Engl J Med*. 2014;371(23):2189–  
863 99.
- 864 22. Forbes SA, Beare D, Gunasekaran P, Leung K, Bindal N, Boutselakis H, et al. COSMIC:  
865 exploring the world’s knowledge of somatic mutations in human cancer. *Nucleic Acids Res*.  
866 2015 Jan;43(Database issue):D805–11.
- 867 23. Rosenthal R, McGranahan N, Herrero J, Taylor BS, Swanton C. DeconstructSigs:  
868 delineating mutational processes in single tumors distinguishes DNA repair deficiencies  
869 and patterns of carcinoma evolution. *Genome Biol*. 2016 Feb 22;17:31.
- 870

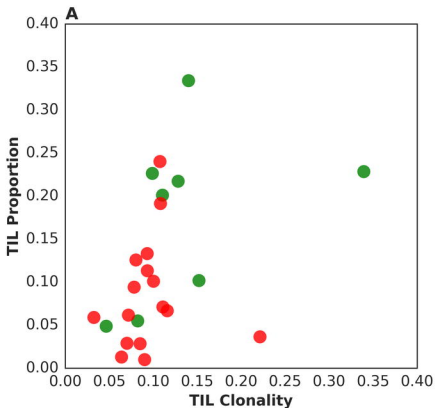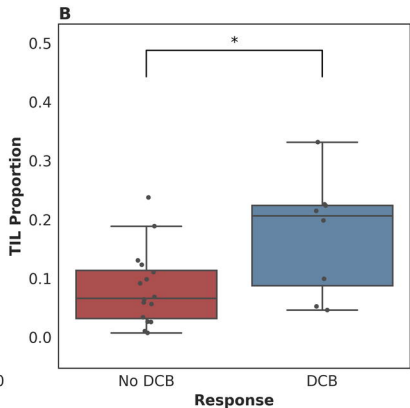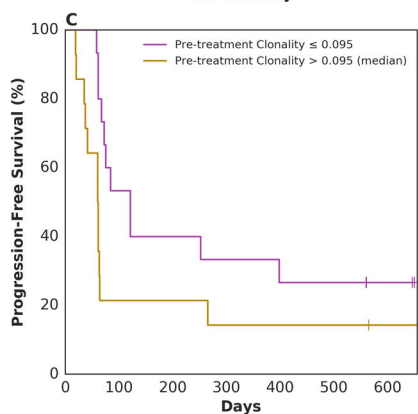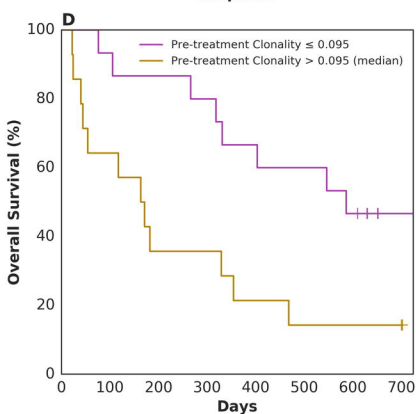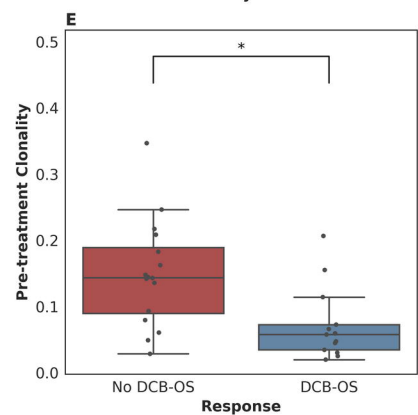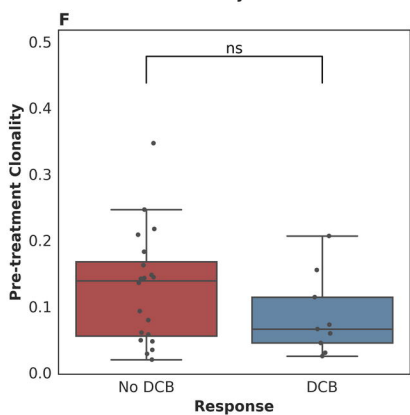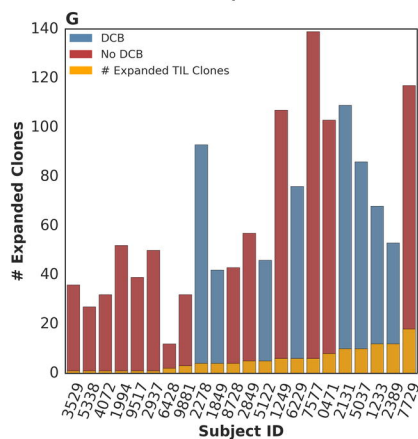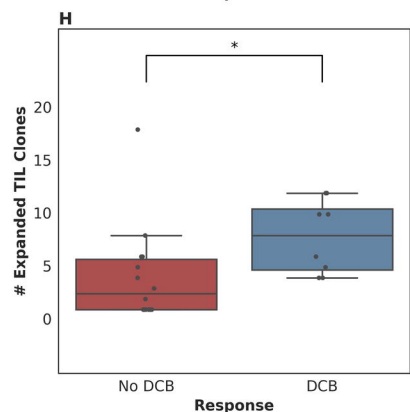

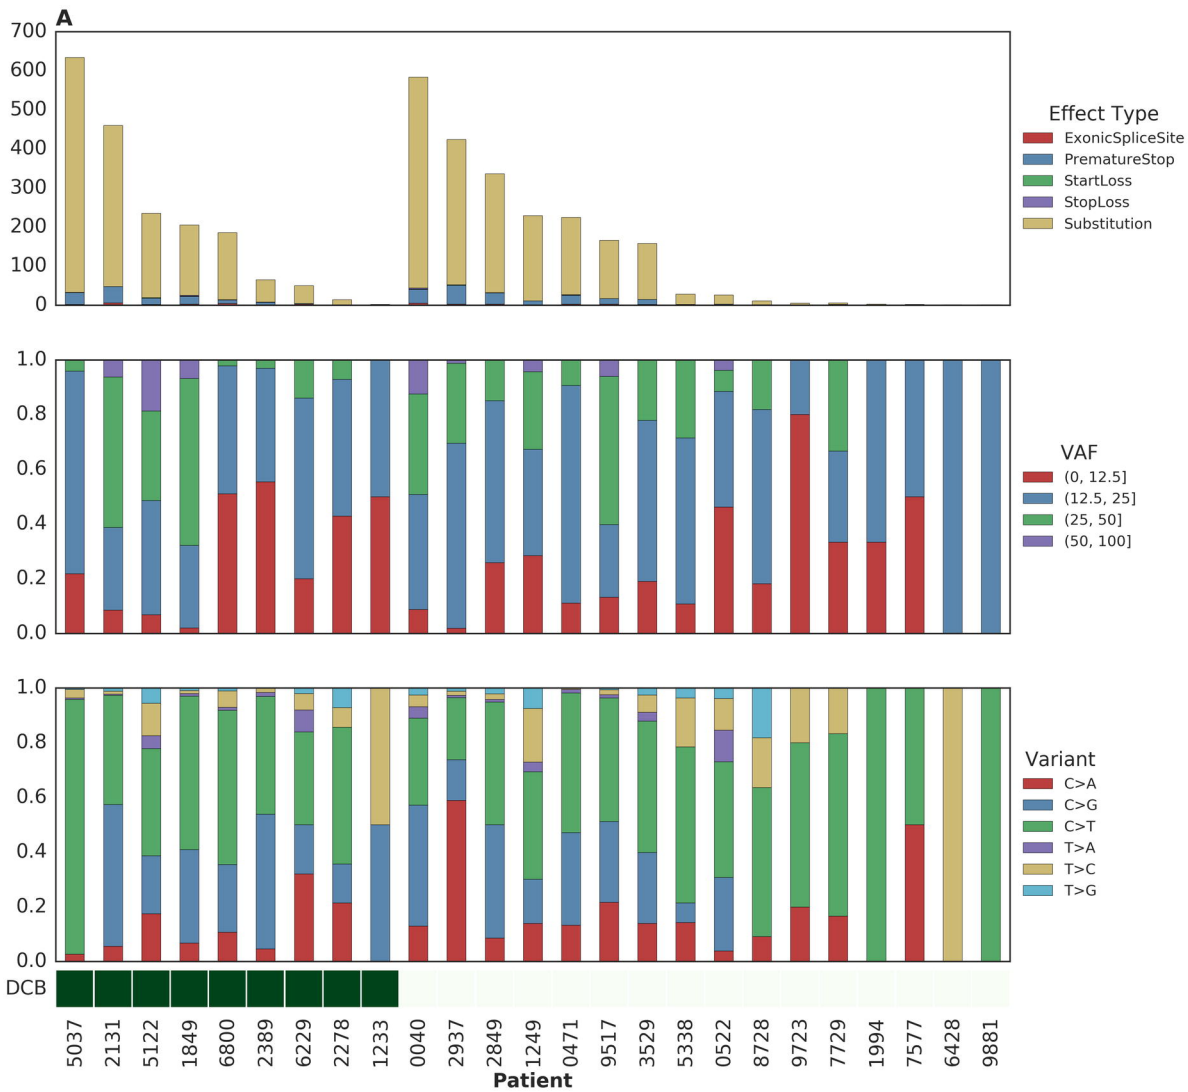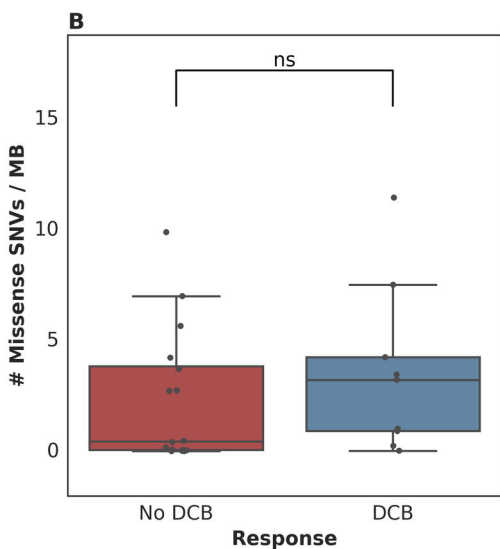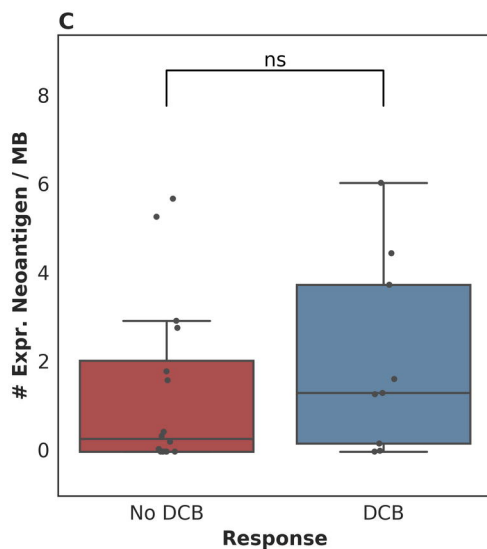

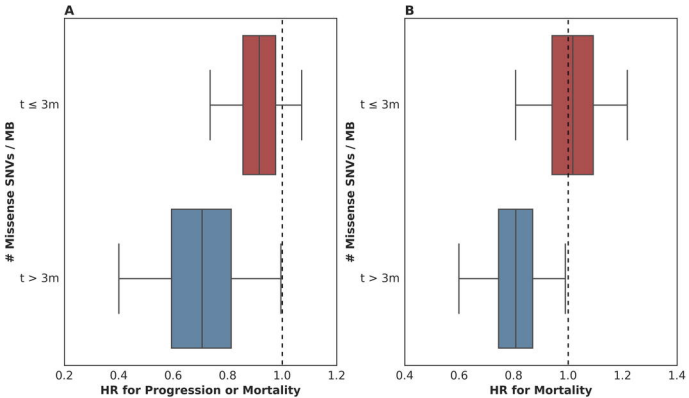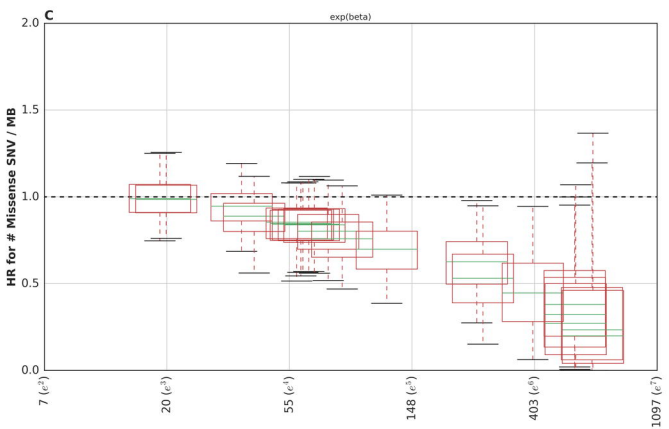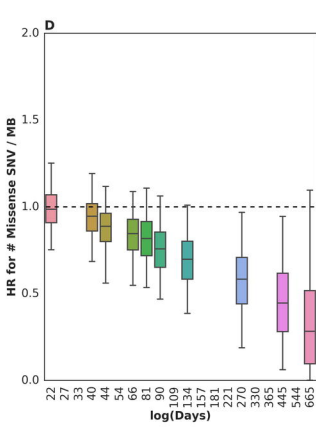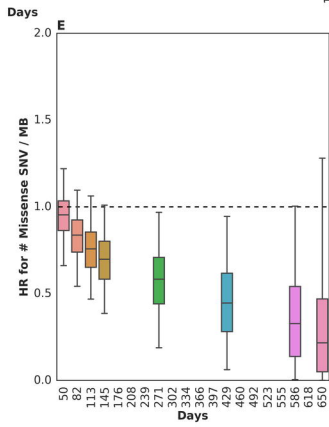

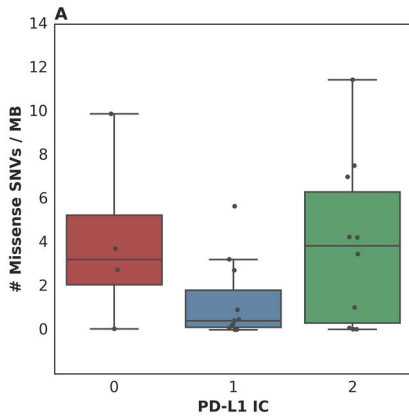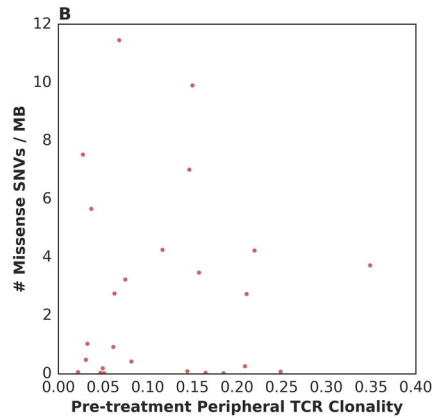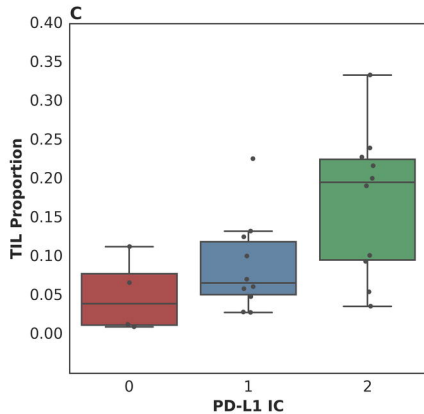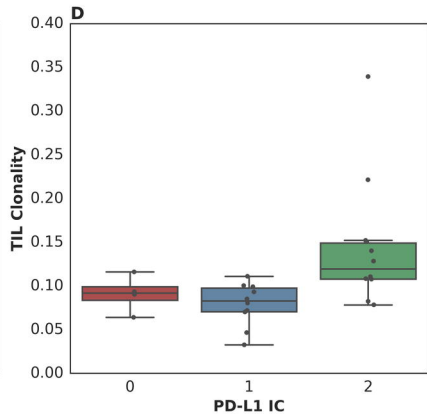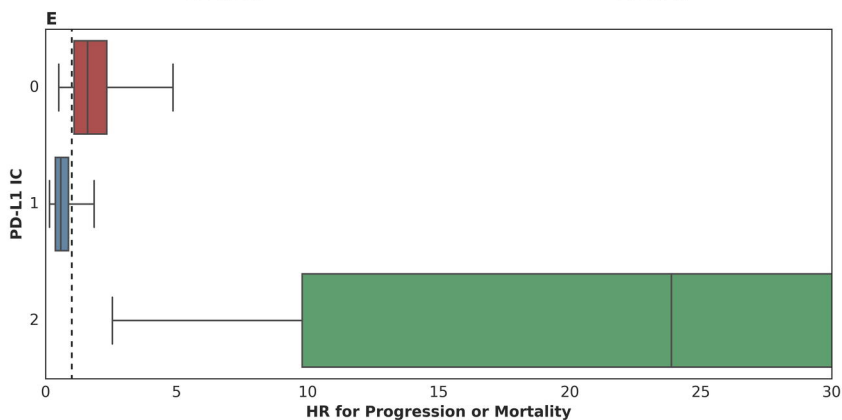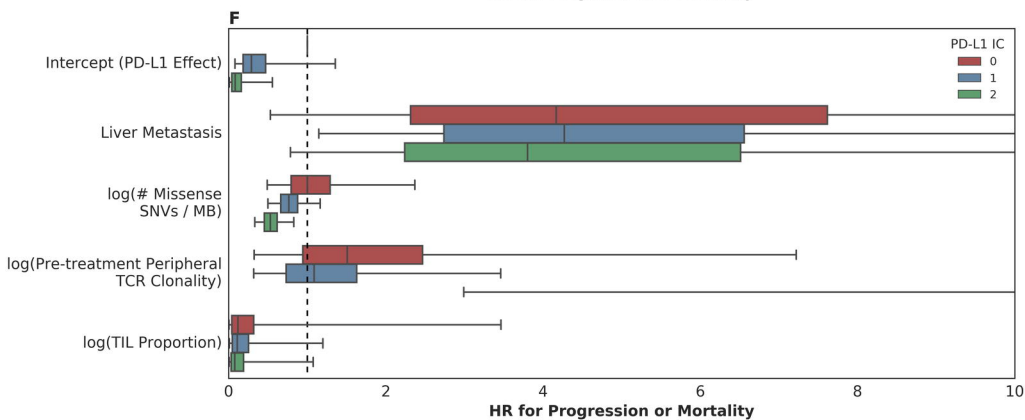

Source: https://www.biorxiv.org/content/10.1101/086843v1.full.pdf
